1 **Novel allelic variant of *Lpa1* gene associated with a**  
2 **significant reduction in seed phytic acid content in rice**  
3 **(*Oryza sativa* L.)**

4  
5 **D.S. Kishor<sup>1</sup>, Choonseok Lee<sup>1</sup>, Dongryung Lee<sup>1</sup>, Jelli Venkatesh<sup>1</sup>, Jeonghwan Seo<sup>1</sup>,**  
6 **Joong Hyoun Chin<sup>2</sup>, Zhuo Jin<sup>1</sup>, Soon-Kwan Hong<sup>3</sup>, Jin-Kwan Ham<sup>4</sup>, Hee-Jong Koh<sup>1\*</sup>**

7  
8 <sup>1</sup> Department of Plant Science, Plant Genomics and Breeding Institute, and Research Institute  
9 of Agriculture and Life Science, Seoul National University, Seoul, South Korea

10 <sup>2</sup> Graduate School of Integrated Bioindustry, Sejong University, Republic of Korea

11 <sup>3</sup> Division of Biotechnology, Kangwon National University, Republic of Korea

12 <sup>4</sup> Gangwon provincial Agricultural Research & Extension Services, Republic of Korea

13  
14 \* Corresponding author

15 Email: [heejkoh@snu.ac.kr](mailto:heejkoh@snu.ac.kr) (HJK)

16  
17 **Data availability statement:** All relevant data are within the paper and in the NCBI Genbank  
18 database (accession number: MH707666).

19  
20 **Abstract**

21 In plants, *myo*-inositol-1,2,3,4,5,6-hexakisphosphate (InsP<sub>6</sub>), also known as phytic acid  
22 (PA), is a major component of organic phosphorus (P), and accounts for up to 85% of the total

23 P in seeds. In rice (*Oryza sativa* L.), PA mainly accumulates in rice bran, and chelates mineral  
24 cations, resulting in mineral deficiencies among brown rice consumers. Therefore,  
25 considerable efforts have been focused on the development of low PA (LPA) rice cultivars. In  
26 this study, we performed genetic and molecular analyses of *OsLpa1*, a major PA biosynthesis  
27 gene, in Sanggol, a low PA mutant variety developed via chemical mutagenesis of Ilpum rice  
28 cultivar. Genetic segregation and sequencing analyses revealed that a recessive allele, *lpa1-3*,  
29 at the *OsLpa1* locus (Os02g0819400) was responsible for a significant reduction in seed PA  
30 content in Sanggol. The *lpa1-3* gene harboured a point mutation (C623T) in the fourth exon of  
31 the predicted coding region, resulting in threonine (Thr) to isoleucine (Ile) amino acid  
32 substitution at position 208 (Thr208Ile). Three-dimensional analysis of Lpa1 protein structure  
33 indicated that *myo*-inositol 3-monophosphate [*Ins*(3)P<sub>1</sub>] kinase binds to the active site of Lpa1,  
34 with ATP as a cofactor for catalysis. Furthermore, the presence of Thr208 in the loop adjacent  
35 to the entry site of the binding pocket suggests that Thr208Ile substitution is involved in  
36 regulating enzyme activity via phosphorylation. Therefore, we propose that Thr208Ile  
37 substitution in *lpa1-3* reduces Lpa1 enzyme activity in Sanggol, resulting in reduced PA  
38 biosynthesis.

39

## 40 **Introduction**

41 In most cereal crops, *myo*-inositol-1,2,3,4,5,6-hexakisphosphate (InsP<sub>6</sub>), also known as  
42 phytic acid (PA), is considered a major source of phosphorus (P) available in the form of  
43 phytate, and accounts for 65–85% of the total P in seeds [1]. Monogastric animals poorly digest  
44 PA, as they lack the phytase enzyme, which is responsible for the release of phosphate residues  
45 [2]. PA is an efficient chelator of mineral cations, such as zinc (Zn<sup>2+</sup>), iron (Fe<sup>2+</sup>), magnesium  
46 (Mg<sup>2+</sup>), potassium (K<sup>2+</sup>), and calcium (Ca<sup>2+</sup>), in the nutritional tract. Because of these attributes,

47 PA is considered as an antinutrient [3, 4]. Hence, there is a need to develop low PA (LPA) crop  
48 cultivars to maximize the nutritional benefits of grains.

49 Mutants associated with the LPA phenotype have been identified in several crop plants  
50 including maize (*Zea mays*) [5, 6], barley (*Hordeum vulgare*) [7], soyabean (*Glycine max*) [8],  
51 rice (*Oryza sativa*) [9], and wheat (*Triticum aestivum*) [10]. Although, LPA mutants are  
52 identified primarily on the basis of percentage reduction of PA and high inorganic P ( $P_i$ ) content  
53 in seeds [5, 11], some mutants show a significant accumulation of *myo*-inositol and inositol  
54 phosphate [ $\text{Ins}(1,3,4)\text{P}_3$  5-/6] intermediates in seeds [12, 13].

55 Previously, the LPA phenotype of seeds has been associated with reduced agronomic  
56 performance of mutant crop plants in the field [5, 14]. It is important to understand the genetic  
57 and molecular bases of reduced agronomic performance of LPA mutants for effective  
58 utilization in breeding programs. In addition, studies show that climate change and elevated  
59 carbon dioxide ( $\text{CO}_2$ ) levels negatively affect micronutrient bioavailability and total P in grains  
60 [15, 16]. Therefore, developing crop cultivars with increased micronutrient bioavailability in  
61 seeds and greater adaptability to environmental variations, by reducing the PA content in grains,  
62 is an important priority of breeding programs.

63 PA is biosynthesized via two different routes: lipid dependent and lipid independent [3,  
64 17]. The lipid dependent pathway operates in all plant organs, whereas the lipid independent  
65 pathway is predominant only in seeds [13, 17, 18]. In the first step of PA biosynthesis, D-  
66 glucose-6-phosphate is converted to *myo*-inositol 3-monophosphate [ $\text{Ins}(3)\text{P}_1$ ] by *myo*-inositol  
67 3-phosphate synthase (MIPS) [19]. This is followed by the sequential phosphorylation of  
68 specific inositol to  $\text{InsP}_6$  through the action of various inositol phosphate kinases (S1 Fig).  
69 However, enzymes involved in lipid independent PA biosynthesis, from  $\text{Ins}(3)\text{P}_1$  seem to be  
70 complicated and are not well understood [3]. Nevertheless, PA biosynthetic genes encoding  
71 other *myo*-inositol enzyme and inositol phosphate kinases are well documented in major plants

72 [12, 13, 20, 21]. Additionally, biochemical and functional analyses of PA biosynthetic genes  
73 encoding Ins monophosphate kinase could address the missing steps in the lipid independent  
74 pathway.

75 In rice, several mutants with low seed PA content have been reported [14, 21-27].  
76 Genetic studies of LPA mutants have shown that a single recessive gene is responsible for the  
77 LPA phenotype in rice and other crop plants [21, 22, 27, 28]. The first *lpa* gene encoding  
78 inositol 1,3,4-triskisphosphate 5/6-kinase (ITPK5/6) was identified in maize, and designated as  
79 *Lpa2*. Subsequently, *myo*-inositol kinase gene *Lpa3*, and multidrug resistance protein (MRP)  
80 ATP binding cassette (ABC) transporter gene *Lpa1* were identified [12, 13, 29]. In addition,  
81 reduction of PA content in *Arabidopsis atipk2β* mutant indicates the inositol 1,4,5-tris-  
82 phosphate (IPK2) kinase of lipid dependent pathway is also active the seeds [20]. In rice,  
83 *OsLpa1* gene has been associated with the reduction in seed PA content and increase in seed P<sub>i</sub>  
84 content, with little change in the total P content in seeds [22, 30]. *OsLpa1* have homology with  
85 one gene, Os09g0572200 (*OsLpa1* paralog) within the rice genome, suggests possible  
86 overlapping or redundant functions [22].

87 Genetic studies in rice have confirmed that a mutation in the *OsLpa1* locus generates  
88 the LPA phenotype in seeds. Molecular characterization of LPA mutants has previously  
89 revealed three alleles of the *OsLpa1* locus, including KBNT *lpa 1-1*, DR1331-2, and Os-lpa-  
90 XQZ-1, responsible for the low PA phenotype of seeds [22, 30]. In the present study, we  
91 report a novel allele of *OsLpa1*, *OsLpa1-3*, responsible for a significant reduction in the seed  
92 PA content in a new LPA mutant rice cultivar Sanggol developed in the Republic of Korea  
93 [31]. Sequence analysis of *OsLpa1-3* revealed a point mutation in the gene coding sequence.  
94 Our data suggest that this mutation is responsible for the LPA phenotype of Sanggol mutant.

95

## 96 **Material and methods**

## 97 **Plant material**

98           The low PA mutant rice cultivar Sanggol derived from a *japonica* rice cultivar Ilpum  
99           mutagenized with *N*-methyl-*N*-nitrosourea (MNU) [31]. Ilpum was used as the wild type in  
100           comparing phenotypic data. Sanggol was crossed with Ilpum to develop F<sub>2</sub> population.  
101           Segregation analysis was performed using the F<sub>2</sub> population. Both parent cultivars and F<sub>2</sub>  
102           individuals were grown in experimental fields of Seoul National University, Republic of Korea.

## 103 **Agronomic trait analysis**

104           To characterize agronomic traits, 15 phenotypic observations were recorded during  
105           various stages of plant growth, according to the Standard Evaluation System (SES) for rice,  
106           2014. Yield data was obtained from “3.6 m X 3.6 m” plot size. All agronomic data were  
107           analyzed using the Student’s *t*-test in SPSS 16.0 ([https://www.ibm.com/analytics/spss-](https://www.ibm.com/analytics/spss-statistics-software)  
108           statistics-software) to determine significant differences among Sanggol, and Ilpum cultivars.

## 109 **Analysis of P<sub>i</sub> and PA content in seeds**

110           Concentrations of P<sub>i</sub> and PA in seeds were examined using P<sup>31</sup> nuclear magnetic  
111           resonance (P<sup>31</sup> NMR) spectroscopy [32], with slight modifications.

## 112 **Sample preparation**

113           Fine powdered samples (1 g dry weight) of brown rice were thoroughly mixed with 10  
114           mL of 2.4% HCl in 14 mL Falcon tubes. Samples were incubated at room temperature for 16  
115           h on an HB-201SF shaker (HANBAEK Scientific Co) at 220 rpm, and subsequently  
116           centrifuged at 1,500 × *g* (combi 514R, Hanil science Inc.) at 10°C for 20 min. Crude extracts  
117           were transferred to a new 14 mL Falcon tube containing 1 g NaCl, and incubated at 25°C for  
118           40 min on a shaker at 220 rpm to dissolve NaCl. Samples were allowed to settle at 4°C for 60  
119           min, and then centrifuged at 1,500 × *g* at 10°C for 20 min.

## 120 **<sup>31</sup>P NMR**

121 For  $^{31}\text{P}$  NMR spectroscopy, samples were prepared by mixing 450  $\mu\text{L}$  of NaCl treated  
122 acid extract with 450  $\mu\text{l}$  of buffer containing 0.11mM EDTA-disodium salt and 0.75 mM  
123 NaOH, 40 mg NaOH, and 100  $\mu\text{L}$   $\text{D}_2\text{O}$  in 1.5 mL microtubes. Sample and standard peaks were  
124 obtained on a 600 MHz spectrometer using Advance 600  $^{31}\text{P}$  NMR system (Bruker, Germany).  
125 PA sodium salt and 85% phosphoric acid were used as external standards for peak  
126 identification and further analysis [33, 34]. For internal calibration, 1 mM of phenylphosphonic  
127 acid was included in 100  $\mu\text{L}$   $\text{D}_2\text{O}$  during NMR measurements. All standards were purchased  
128 from Sigma-Aldrich, USA.

129 To determine significant differences in seed PA and  $\text{P}_i$  contents among parents and  $\text{F}_2$   
130 individuals, data were analyzed using the Student's  $t$ -test in SPSS 16.0  
131 (<https://www.ibm.com/analytics/spss-statistics-software>).

## 132 **Expression analysis of PA biosynthetic genes**

133 Genes involved in PA biosynthesis and transport were identified from the RAB-DB and  
134 from recent studies [25, 35, 36]. The rice microarray database, RiceX-Pro, shows different  
135 expression patterns of most of the PA biosynthetic genes in various tissues and organs [37]. To  
136 confirm the expression pattern of PA biosynthetic genes, spikelets were harvested from the  
137 wild cultivar Ilpum at 5 days after flowering (DAF), and total RNA was extracted using  
138 RNAiso Plus (Takara Bio, Japan). The extracted RNA samples were treated with RNase-free  
139 recombinant DNase I (Takara Bio, Japan) to eliminate genomic DNA contamination, and  
140 first-strand cDNA was synthesized using M-MLV reverse transcriptase (Promega, USA). The  
141 PA biosynthetic genes (200–550bp) were amplified from cDNA samples by reverse  
142 transcription polymerase chain reaction (RT-PCR) using gene-specific primers (Table 1) with  
143 the following conditions: initial denaturation at 95°C for 2 min, followed by 32 cycles of  
144 denaturation at 95°C for 20 s, annealing at 58°C for 40 s, and extension at 72°C for 1 min, and  
145 a final extension at 72°C for 5 min. The *Actin* gene was used as an internal control.

146

147 **Table 1. RT-PCR primers used to amplify PA biosynthetic genes.**

| Gene ID      | Primer name       | Sequence (5'→3')      |
|--------------|-------------------|-----------------------|
| Os03g0192700 | <i>OsRINO1F</i>   | AGTGGACAAGGTGGTGGTGT  |
|              | <i>OsRINO1R</i>   | ATCACCACCAATCAGGCAGT  |
| Os10g0369900 | <i>OsRINO2F</i>   | GAAGAGCAAGGTGGACAAGG  |
|              | <i>OsRINO2R</i>   | CATCTTGGTCTGCCACTCT   |
| Os03g0587000 | <i>OsIMP1F</i>    | GTGGATTTGGTGACGGAGAC  |
|              | <i>OsIMP1R</i>    | ATCGAGACGCAAACAAAAGG  |
| Os02g0169900 | <i>OsIMP2F</i>    | CCTCTTCACACCGCAGGAAT  |
|              | <i>OsIMP2R</i>    | CTGGATGACGCCGAGGAG    |
| Os07g0507300 | <i>OsMIK1F</i>    | TCTACTGGGACGGTGGAGAG  |
|              | <i>OsMIK1R</i>    | TAGCCGCTTCTTGGAGTGAT  |
| Os02g0819400 | <i>OsLPA1F</i>    | TATGTGGGACTAGCGGATGC  |
|              | <i>OsLPA1R</i>    | GAGCAACTGCAACAGGGTCT  |
| Os09g0572200 | <i>OsLPA1-P F</i> | CGGCTGATGTTCCACCTAAT  |
|              | <i>OsLPA1-P R</i> | TTGACGCTTTCTCAATGTGC  |
| Os10g0103800 | <i>OsITPK1F</i>   | ACAAGGAGTGGCAGCAAGTT  |
|              | <i>OsITPK1R</i>   | CAACCAAGGGCAACGTTAGT  |
| Os03g0230500 | <i>OsITPK2F</i>   | TCTGGTCCTCCAGGAATTTG  |
|              | <i>OsITPK2R</i>   | CCAGTCTTCCACGAAGCTCT  |
| Os03g0726200 | <i>OsITPK3F</i>   | AGGGAGGAACACCCAGAAGT  |
|              | <i>OsITPK3R</i>   | ACCAGAGGCTTTGCCACTAA  |
| Os02g0466400 | <i>OsITPK4F</i>   | ACATGCGCCTCGTCTACC    |
|              | <i>OsITPK4R</i>   | GTTGGAGATGTTGGCGAAG   |
| Os10g0576100 | <i>OsITPK5F</i>   | CCAGCTCCTCAAAGTCTGCT  |
|              | <i>OsITPK5R</i>   | TTTGTCATGCTCCTTCTCA   |
| Os09g0518700 | <i>OsITPK6F</i>   | GCAAAACGAGGTGCAAGATA  |
|              | <i>OsITPK6R</i>   | GCTTGATTGCATCCCAGAAT  |
| Os04g0661200 | <i>OsIPK1F</i>    | CAACCGGCACCAAAGTGTAT  |
|              | <i>OsIPK1R</i>    | CAGAATCAGCTCCAGCATCA  |
| Os02g0596100 | <i>OsGLE1F</i>    | AGACCGCGTCTTGTCTGC    |
|              | <i>OsGLE1R</i>    | GTCGAGCTCGGTGAGGAC    |
| Os02g0523800 | <i>OsIPK2F</i>    | CTCTTCTACAAGCCCCTCCA  |
|              | <i>OsIPK2R</i>    | GAGGCACTTGGCGACGTA    |
| Os03g0142800 | <i>OsMRP13F</i>   | GCTTATTGCATTGGGTAGGG  |
|              | <i>OsMRP13R</i>   | TTACCCGAAGCTCTGATGCT  |
| Os03g0836000 | <i>Actin 4</i>    | AGGCAGTCAGTCAGATCACGA |
|              | <i>Actin 5</i>    | GAGACATTCAATGCACCAGCA |

148

149 **Sequence analysis**

150 Genomic DNA and cDNA were isolated from young leaves and spikelets of Sanggol  
151 low PA mutant cultivar, respectively. Fragments of size 300bp-2000bp were amplified from  
152 the coding region and untranslated region (UTR) of 16 genes of lipid dependent and  
153 independent pathways using gene-specific primers designed with primer3  
154 (<http://bioinfo.ut.ee/primer3-0.4.0/>) (S1 Table). The PCR products were purified using the  
155 DNA Purification Kit (Inclone, Korea), and analyzed with an ABI Prism 3730 XL DNA  
156 Analyzer (PE Applied Biosystems, USA). In addition, sequences of all 16 genes in Ilpum  
157 was downloaded from the crop molecular breeding lab server (<http://nature.snu.ac.kr/rice/>).  
158 Sequences were aligned using the Codon Code Aligner software (Codon Code Corporation,  
159 USA).

## 160 **Candidate gene analysis**

161 To confirm nucleotide polymorphisms in the candidate genes, validation primers were  
162 designed using Primer3 for cDNA sequencing (Table 2). The PCR products were purified  
163 using the DNA Purification Kit (Inclone, Korea), and analyzed with an ABI Prism 3730 XL  
164 DNA Analyzer (PE Applied Biosystems, USA). Sequences were aligned using the Codon  
165 Code Aligner software (Codon Code Corporation, USA). Simultaneously, BLAST search  
166 was performed using the predicted amino acid sequences of the candidate genes in the NCBI  
167 database (<https://blast.ncbi.nlm.nih.gov/Blast.cgi>), and deleterious amino acid substitutions  
168 were predicted using Provean web server with proven scores [38].

169



170

171 **Table 2. Primers used for validating cDNA sequences and genotyping the F<sub>2</sub> population.**

| Analysis        | Primer name      | Sequence (5'→3')     | Amplicon size                                                                                    |
|-----------------|------------------|----------------------|--------------------------------------------------------------------------------------------------|
| cDNA validation | <i>Lpa1-3 F</i>  | GCCATGCCTTCAAGATTAGC | 1,186 bp                                                                                         |
|                 | <i>Lpa1-3 R</i>  | TGAAACATTCCCTTGGAACC |                                                                                                  |
| Genotyping      | <i>Lpa1-3-1F</i> | AGCATTCGCCTGCATGATCG | Homozygous wild-type (192 bp), homozygous mutant (174 bp), heterozygous (both 192 bp and 174 bp) |
|                 | <i>Lpa1-3-1R</i> | CGCTTACCGAACAATGAATG |                                                                                                  |

172

173 **Expression analysis of *Lpa* and lipid dependent PA biosynthesis**  
174 **genes in Sanggol and Ilpum cultivars.**

175 Total RNA was extracted from the leaves at 15 days after germination (DAG) to  
176 analyze the expression of *Lpa* and lipid dependent pathway genes, and 5 DAF from spikelets  
177 to analyze the expression of *OsLpa1* in Sanggol and Ilpum cultivars. For the expression  
178 analysis of *OsLpa1* paralog and *OsIpk2* genes, total RNA was extracted only from spikelets at  
179 5 DAF. RNA extraction was performed as described above. The extracted RNA was subjected  
180 to RT-PCR using gene-specific primers (Table 3). The *Actin* gene was used as an internal  
181 control.

182

183

184 **Table 3. RT-PCR primers used to amplify *Lpa* and *Ipk2* genes.**

| Gene ID      | Transcript            | Primer name     | Primer sequence (5'→3') | Amplicon size |
|--------------|-----------------------|-----------------|-------------------------|---------------|
| Os02g0819400 | <i>OsLpa1.1</i>       | <i>lpa1.1 F</i> | TATGTGGGACTAGCGGATGC    | 192 bp        |
|              |                       | <i>lpa1.1 R</i> | GAGCAACTGCAACAGGGTCT    |               |
|              | <i>OsLpa1.2</i>       | <i>lpa1.2 F</i> | TATGTGGGACTAGCGGATGC    | 445 bp        |
|              |                       | <i>lpa1.2 R</i> | GAGCAACTGCAACAGGGTCT    |               |
|              | <i>OsLpa1.3</i>       | <i>lpa1.3 F</i> | ATCTTTCGGGATCAGTGCAT    | 200 bp        |
|              |                       | <i>lpa1.3 R</i> | TGGCAGCATGTTTCTCCTATC   |               |
| Os09g0572200 | <i>OsLpa1</i> paralog | <i>OsLPA2F</i>  | CGGCTGATGTTCCACCTAAT    | 236 bp        |
|              |                       | <i>OsLPA2R</i>  | TTGACGCTTTCTCAATGTGC    |               |
| Os02g0523800 | <i>OsIpk2-0</i>       | <i>OsIPK2F</i>  | CTCTTCTACAAGCCCCTCCA    | 291 bp        |
|              |                       | <i>OsIPK2R</i>  | GAGGCACTTGGCGACGTA      |               |
| Os03g0836000 | <i>OsActin</i>        | <i>Actin 4</i>  | AGGCAGTCAGTCAGATCACGA   | 194 bp        |
|              |                       | <i>Actin 5</i>  | GAGACATTCAATGCACCAGCA   |               |

185

186

## 187 **Derived cleaved amplified polymorphic sequence (dCAPS)** 188 **analysis**

189 Genomic DNAs were isolated from all 96 F<sub>2</sub> plants derived from cross between Sanggol  
190 and Ilpum, and subjected to dCAPS analysis. The F<sub>2</sub> genotyping primers (Table 2) were  
191 designed using dCAPS 2.0 (<http://helix.wustl.edu/dcaps/>) to validate a single nucleotide  
192 substitution (C to T) in the *OsLpa1* gene in Sanggol cultivar, which generates a *TaqI* restriction  
193 site (TCGA) in the amplified PCR product. PCR was performed using the following conditions:  
194 initial denaturation at 95°C for 2 min, followed by 32 cycles of denaturation at 95°C for 20 s,  
195 annealing at 58°C for 40 s, and extension at 72°C for 30 s, and a final extension at 72°C for 1  
196 min. The amplified PCR product was digested with *TaqI* restriction endonuclease (Promega,  
197 USA), and separated on 3% agarose gel.

## 198 **Multiple sequence alignment and phylogenetic analysis**

199 Amino acid sequences of the Lpa superfamily were obtained from the NCBI protein  
200 database (<https://blast.ncbi.nlm.nih.gov/Blast.cgi?PAGE=Proteins>), and subjected to multiple  
201 sequence alignment using the Clustal Omega program  
202 (<https://www.ebi.ac.uk/Tools/msa/clustalo/>). Multiple sequence alignment editing,  
203 visualization, and analysis was performed using Jalview 2.10.4 (<http://www.jalview.org/>). The  
204 Lpa and other superfamily proteins obtained from the NCBI protein database were used for  
205 phylogenetic analysis. Neighbour-joining tree was constructed using MEGA 7 [39] with 1,000  
206 bootstrap replicates.

## 207 **Biocomputational analysis**

208 A three-dimensional (3D) model of Lpa1 protein was produced under the intensive  
209 mode of the Phyre2 server [40] ([www.sbg.bio.ic.ac.uk/phyre2/html/](http://www.sbg.bio.ic.ac.uk/phyre2/html/)). The ligand and  
210 cofactor were downloaded from the PubChem database (<https://pubchem.ncbi.nlm.nih.gov/>)

211 for protein ligand analysis. Furthermore, auto docking and 3D model were analyzed using  
212 the CLC drug discovery workbench 4.0 (QIAGEN, Denmark). Putative phosphorylation sites  
213 were predicted with the GPS 3.0 server (<http://gps.biocuckoo.org/>) using high cut-off values  
214 ranging from 1.36 to 17.72.

215

## 216 **Results**

### 217 **Agronomic characterization of Sanggol low PA mutant and Ilpum** 218 **cultivars**

219 Analysis of agronomic traits demonstrated a significant reduction in the plant height  
220 (cm), number of productive tillers, culm length (cm), first intermodal length (cm), 1,000-grain  
221 weight (g), number of spikelets per panicle, number of panicles per plant, and yield components  
222 of Sanggol compared with Ilpum (Table 4 and Fig 1A). By contrast, the number of days to 50%  
223 flowering was significantly higher in Sanggol than in the Ilpum, indicating delayed flowering  
224 in the mutant cultivar. In addition, Sanggol exhibited significantly higher percentage of chalky  
225 grains compared with the wild cultivar. However, no significant differences were observed  
226 between the two cultivars in morphological characteristics, such as secondary internodal length,  
227 grain length, grain width, panicle length, and spikelet fertility (Fig 1B and Fig 1C). Overall,  
228 these data indicate that Sanggol low PA mutant shows poor agronomic performance with  
229 respect to the flowering time, yield, and yield components compared with the Ilpum.

230

231 **Table 4. Agronomic traits of the wild-type cultivar Ilpum and low PA mutant cultivar Sanggol.**

| Traits <sup>a</sup>       | PH<br>(cm) | NPT | DFE   | CL<br>(cm) | FIL<br>(cm) | SIL<br>(cm) | GL<br>(mm) | GW<br>(mm) | KGW<br>(g) | GC<br>(%) | NSP | NPP | PL<br>(cm) | SPF<br>(%) | YPP<br>(g) |
|---------------------------|------------|-----|-------|------------|-------------|-------------|------------|------------|------------|-----------|-----|-----|------------|------------|------------|
| Wild                      | 97         | 22  | 116.7 | 75         | 40.5        | 15          | 5.01       | 2.97       | 20.93      | 43.62     | 187 | 12  | 22         | 97         | 760        |
| Mutant                    | 77         | 13  | 122.5 | 54         | 35.5        | 14.83       | 4.81       | 3.03       | 18.9       | 54.66     | 165 | 8   | 23         | 96         | 470        |
| Significance <sup>b</sup> | **         | **  | **    | **         | **          | NS          | NS         | NS         | **         | **        | **  | *   | NS         | NS         | **         |

232

233 <sup>a</sup>Traits: PH, plant height; NPT, number of productive tillers; DFE, days to 50% flowering; CL, culm length; FIL, first internodal length; SIL,  
 234 second internodal length; GL, grain length; GW, grain width; KGW, 1,000 grain weight; GC, grain chalkiness; NSP, number of spikelets per  
 235 panicle; NPP, number of panicles per plant; PL, panicle length; SPF, spikelet fertility; YPP, yield per plot

236 <sup>b</sup>Asterisks indicate the level of significance (\*,  $P < 0.05$ ; \*\*,  $P < 0.01$ ). NS, non-significant.

237

238 **Fig 1. Phenotypic comparison between Sanggol mutant (*lpa*) and wild-type (WT) cultivar**  
239 **Ilpum.** (A) Whole plant. (B) Spikelet. (C) Mature grain.

240

## 241 **Determination of PA and P<sub>i</sub> content in Sanggol and Ilpum seeds**

242 To quantify PA and P<sub>i</sub> content in seeds, brown rice extracts of Sanggol and Ilpum were  
243 analyzed via <sup>31</sup>P NMR spectroscopy. Results showed that PA contents were significantly  
244 reduced (49% reduction), and P<sub>i</sub> content was significantly increased in the seeds of Sanggol  
245 compared with Ilpum (Table 5). The <sup>31</sup>P NMR analysis showed peaks analogous to standard  
246 (Fig 2A) for P<sub>i</sub> and PA peak identification. Similarly, P<sub>i</sub> and PA analogous peaks were observed  
247 for wild (WT) (Fig 2B), and mutant (*lpa*) (Fig 2C) types.

248 Additionally, PA and P<sub>i</sub> amounts were also quantified among 96 F<sub>2</sub> individuals using  
249 <sup>31</sup>P NMR spectroscopy. Segregation analysis revealed that 77 F<sub>2</sub> plants showed the wild-type  
250 phenotype, whereas 19 F<sub>2</sub> plants showed the mutant phenotype (Table 6), and the phenotype  
251 segregation fitted a 3:1 ratio, suggesting that a single recessive allele controls the low PA in  
252 the seeds of Sanggol mutant cultivar.

253

254 **Table 5. Seed PA and P<sub>i</sub> content in Sanggol and Ilpum cultivars.**

| Cultivar | PA P (mg g <sup>-1</sup> ) | P <sub>i</sub> (mg g <sup>-1</sup> ) | Total P (mg g <sup>-1</sup> ) |
|----------|----------------------------|--------------------------------------|-------------------------------|
| Ilpum    | 5.7 ± 0.34                 | 0.1 ± 0.04                           | 5.85 ± 0.34                   |
| Sanggol  | 2.9 ± 0.69*                | 1.8 ± 0.10**                         | 5.21 ± 0.62                   |

255

256 Data represent mean ± standard error (*n* = 3).

257 Asterisks indicate the level of significance (\*, *P* < 0.05; \*\*, *P* < 0.01) between Sanggol and Ilpum.

258

259 **Fig. 2. <sup>31</sup>P NMR spectrum of standard, Ilpum (WT), and Sanggol mutant (*lpa*) (A)**

260 Reference standard peaks. (B) Wild ‘WT’ (C) *lpa* ‘Mutant’.

261

262 **Table 6. Segregation and co-segregation analysis of seed PA content among 96 F<sub>2</sub> individuals derived from a cross between Sanggol and**  
263 **Ilpum cultivars.**

| Cross          | No. of F <sub>2</sub> plants | PA phenotype |        |          |          |                  | dCAPS genotyping |    |    |          |          |                  |
|----------------|------------------------------|--------------|--------|----------|----------|------------------|------------------|----|----|----------|----------|------------------|
|                |                              | High PA      | Low PA | Expected | $\chi^2$ | <i>P</i> -value† | W*               | M* | H* | Expected | $\chi^2$ | <i>P</i> -value† |
| Sanggol /Ilpum | 96                           | 77           | 19     | 3:1      | 1.38     | 0.23             | 26               | 19 | 51 | 1:2:1    | 1.39     | 0.49             |

264 †Not significant ( $P > 0.05$ ).

265 \*Wild: homozygous wild-type, H: heterozygous, M: homozygous mutant.

266

## 267 **Expression of PA biosynthetic gene and sequence analysis**

268 To identify the gene responsible for reduced PA content in seeds, the candidate gene  
269 approach was followed. In rice, PA biosynthesis and accumulation begins after flowering [42,  
270 43], and continues until 25 DAF during seed development [44]. Therefore, we extracted total  
271 RNA from ‘Ilpum’ spikelets at 5 DAF, and subjected it to RT-PCR analysis. Results showed  
272 that 15 genes in the PA biosynthesis pathway were expressed at 5 DAF (Fig 3). Further, we  
273 amplified and sequenced 16 genes involved in PA biosynthesis from sanggol and Ilpum  
274 cultivars (S1 Table).

275

276 **Fig 3. Semi-quantitative RT-PCR analysis of PA biosynthetic genes at 5 DAF in the Ilpum**  
277 **cultivar.**

278

279 Sequence analysis of PA biosynthetic genes revealed a single nucleotide polymorphism  
280 (SNP) in the *OsLpa1* gene of Sanggol *lpa* mutant (Fig 4A); none of the other PA biosynthetic  
281 genes showed mutations in Sanggol *lpa* mutant. Previously, the *OsLpa1* locus has been mapped  
282 to chromosome 2 [11], and narrowed down to a region less than 150 kb using microsatellite  
283 and sequence tagged site markers [45]. Further, the *OsLpa1* has been characterized in *lpa*  
284 mutants of rice [22, 30]. The *OsLpa1* gene encodes three expressed splice variants in rice [22,  
285 35]. Sequence analysis of the *OsLpa1* locus (position +1 to 2,058 bp; Genbank accession  
286 number: MH707666) showed a SNP (C623T) in the fourth exon of the largest splice variant,  
287 designated as *OsLpa1-3.1*, in Sanggol *lpa* mutant. Additionally, another SNPs (C53T) was  
288 identified in the first exon of the small splice variants, *OsLpa1-3.2* and *OsLpa1-3.3* (S2 Fig).  
289 Further, sequence analysis of *OsLpa1-3.1* cDNA confirmed the presence of *lpa1-3* allele in  
290 Sanggol mutant (Fig 4B).

291



292

293 **Fig 4. Gene structure of *OsLpa1* according to Kim et al. [22] and Zhao et al. [30]. (A)**

294 Structure of the novel splice variant *OsLpa1-3.1* carrying the C623T mutation in Sanggol low

295 PA mutant cultivar. Empty boxes represent 5'UTR and 3'UTR, black box represents the coding

296 region, and lines between boxes indicate introns. ATG (start codon) and TGA (stop codon) are

297 shown for each splicing variant. (B) cDNA validation of *OsLpa1-3.1* showing *Lpa1-3* allele in

298 the Sanggol mutant cultivar.

299

300 To determine the expression of *OsLpa1* splice variants in mutant and wild-type

301 cultivars, we performed RT-PCR analysis of *OsLpa1* gene at 15 DAG using total RNA isolated

302 from leaves and spikelets at 5 DAF. Expression analysis revealed that both *OsLpa1-3.1* and

303 *OsLpa1-3.2* were expressed at 15 DAG, with slightly different expression patterns, whereas

304 *OsLpa1-3.3* showed no expression at 15 DAG in both cultivars (Fig 5A), indicating that

305 *OsLpa1-3.1* and *OsLpa1-3.2* play an important role in seedling growth. At 5 DAF, *OsLpa1-3.1*

306 showed strong expression in both Sanggol *lpa* mutant and wild cultivar Ilpum; however,

307 *OsLpa1-3.3* exhibited low expression in both cultivars, and *OsLpa1-3.2* exhibited no

308 expression in either cultivar, suggesting *OsLpa1-3.1* as a candidate transcript responsible for

309 the seed low PA phenotype of Sanggol mutant. Protein analysis of *Lpa1* amino acid sequence

310 predicted deleterious amino acid substitution changes threonine (Thr) to isoleucine (Ile) in

311 *OsLpa3.1* (Thr208Ile), with a -5.715 proven score. Similarly, deleterious amino acid

312 substitution changes were observed in *OsLpa3.2* and *OsLpa3.3* (Thr18Ile), with -5.482 proven

313 scores.

314

315 **Fig 5. RT-PCR analysis of the *Lpa* gene family in Sanggol and Ilpum. (A) Expression of**

316 *OsLpa1* gene at 15 DAG and 5 DAF. (B) Expression of *OsLpa1* gene paralog at 5 DAF.

317

318           Additionally, expression of the *OsLpa1* paralog, reported previously by Kim et al. [22],  
319 was investigated at 5 DAF in Sanggol *lpa* mutant and wild cultivars using RT-PCR. The  
320 *OsLpa1* paralog exhibited strong expression in both Sanggol *lpa* mutant and wild cultivars (Fig  
321 5B), suggesting that sequence variation in the coding region of *OsLpa1* was responsible for the  
322 low PA content of Sanggol seeds. In addition, reduction of PA content in *Arabidopsis atipk2β*  
323 mutant indicates the IPK2 kinase of lipid dependent pathway is active the seeds [20]. We also  
324 ruled out the possibility for seed PA biosynthesis similar to *Arabidopsis* in Sanggol low PA  
325 mutant cultivar. However, our RT-PCR results showed no expression of *OsIpk2*, a key PA  
326 biosynthesis gene in the lipid dependent pathway (data not shown), suggesting that the lipid  
327 dependent pathway is not active in the Sanggol or Ilpum cultivar.

328           Next, we performed multiple sequence alignment of Lpa1 amino acid sequences of  
329 Sanggol and other major plant species. Results revealed an amino acid substitution in the  
330 conserved kinase domain in Sanggol (Fig 6A), thus showing the impact of a SNP in gene  
331 coding sequence. The kinase domain of Lpa1 shows weak homology with that of 2-  
332 phosphoglycerate kinase (2-PGK) found in hyperthermophilic methanogens [22]. However,  
333 there is structural similarity among the substrates and products of 2-PGK and Lpa1 [46].

334           Phylogenetic analysis revealed a strong relationship among the kinase proteins in the  
335 glycolysis and PA biosynthesis pathways. This suggests that Lpa proteins encoding Ins(3)P<sub>1</sub>  
336 kinase are classified into the Lpa clade (Fig 6B).

337

338 **Fig 6. Multiple sequence alignment and phylogenetic analysis of Lpa protein.** (A) Multiple  
339 sequence alignment of Lpa1 protein from Sanggol (s-mtLpa1) and other major plant species.  
340 The P-loop kinase domain of 2-PGK found in *Methanothermus fervidus* is marked with a red  
341 line. P-loop is an ATP/GTP binding site motifs (Walker A and Walker B) are indicated using

342 pink and black arrowheads, respectively. The yellow box shows a single amino acid  
343 substitution in the conserved kinase domain in Sanggol cultivar. (B) Phylogenetic relationship  
344 among protein families of various kinases, including 2-PGK, serine threonine protein kinase  
345 (S/T), fructokinase (FK), *myo*-inositol kinase 1 (MIK), inositol 1,3,4,5,6 pentakisphosphate 2-  
346 kinase (IPK1), inositol 1,4,5-tris-phosphate kinase (IPK2), hexokinase 1 (HXK), and  
347 hexokinase 2, with the *Lpa* protein clade. Phylogenetic tree was constructed using amino acid  
348 sequences of *Lpa* and other kinase protein families from selected species using the neighbour-  
349 joining method with 1,000 bootstrap replicates. Protein homologs are indicated with an ‘H’.  
350 ob, *Oryza brachyantha*; Os-J, *Oryza sativa* L. *japonica*; Osi, *Oryza sativa* L. *indica*; Agt/Ast,  
351 *Aegilops tauschii*; sb, *Sorghum bicolor*; zm, *Zea Mays*; Si, *Setaria italica*; Ao, *Asparagus*  
352 *officinalis*; Ga, *Gossypium arboreum*; Cc, *Cajanus cajan*; Gm, *Glycine max*; Cm, *Cucurbita*  
353 *maxima*; ta, *Nicotiana tabacum*; Bn, *Brassica napus*; At, *Arabidopsis thaliana*; Ac, *Ananas*  
354 *cosmos*; Ztm, *Zotera marina*; Ci, *Chrysanthemum indicum*; Mf, *methanothermus fervidus*; R-  
355 570, *Saccharum*; Al, *Arabidopsis lyrata*.

356

### 357 **Co-segregation analysis of low PA phenotype with *lpa1-3* allele**

358 A dCAPS assay was developed to determine the co-segregation of *lpa1-3* allele with  
359 the low PA phenotype (Fig 7). A pair of dCAPS markers amplified a 192 bp PCR product.  
360 Digestion of this PCR product with *TaqI* yielded a 174 bp fragment in Sanggol, but an uncut  
361 fragment (192 bp) in Ilpum. Genotyping the F<sub>2</sub> individuals using this dCAPS marker showed a  
362 segregation ratio, which was consistent with the expected ratio of 1:2:1 (Table 3). In addition,  
363 the dCAPS marker genotype co-segregated with the low PA phenotype in the F<sub>2</sub> population.  
364 Statistical analysis using Student’s *t*-test revealed significant differences in the seed PA (S3  
365 Fig) and P<sub>i</sub> (S4 Fig) contents of Ilpum, Sanggol, and F<sub>2</sub> individuals.

366

367 **Fig 7. dCAPS analysis of *lp1-3* allele in the F<sub>2</sub> population derived from a cross between**  
368 **Sanggol and Ilpum.** P1, ‘Ilpum’; P2, ‘Sanggol’; W, homozygous wild type; M, homozygous  
369 mutant; H, heterozygous.

370

## 371 **Biocomputational analysis**

372 Structural analysis of Lpa1 using molecular docking of ligand and cofactors showed  
373 that Ins(3)P<sub>1</sub> kinase was able to bind to the active site of Lpa1 protein, with ATP as a cofactor  
374 for catalysis (Fig 8A). Detailed view of the 3D protein model showed that Thr residue at amino  
375 acid position 208 was located in the kinase loop (Fig 8B) on the outer surface of the protein,  
376 adjacent to the entry site of the binding pocket, thus indicating its potential involvement in  
377 regulating the enzyme activity of Lpa1 protein. In addition, GPS 3.0 predicted Thr208 residue  
378 as a putative phosphorylation site, with a score of 9.66 above the cut-off value of 8.31. In  
379 previous studies, biochemical characterization of the regulatory mechanisms of various other  
380 metabolic enzymes has shown that amino acid substitutions are responsible for the reduction  
381 in enzyme activity of mutant proteins compared with wild-type proteins [47, 48]. Altogether,  
382 our results suggest that Thr208Ile amino acid substitution regulates the enzyme activity of Lpa1  
383 protein via phosphorylation in Sanggol mutant cultivar.

384

385 **Fig 8. Three-dimensional (3D) model of Lpa1 protein structure.** (A) 3D model of Lpa1  
386 protein showing Ins(3)P<sub>1</sub> (ligand) binding site and ATP (cofactor). (B) Thr208Ile substitution  
387 is indicated with an arrow, and the P loop containing Walker A and Walker B motifs is shown.

388

## 389 **Discussion**

390 To date, several genes controlling PA biosynthesis have been reported in major crop  
391 plants [13, 20, 25, 28, 49-51]. The biosynthesis of PA proceeds via two major routes: a lipid  
392 dependent pathway, which operates in all plant tissues, and lipid independent pathway, which  
393 operates predominantly in seeds [3, 17]. In rice, molecular characterization of genes encoding  
394 MIPS, MIK, *Lpa1*, ITPK5/6, and IPK1 has revealed association with the low PA phenotype  
395 [21-25]. The first step of PA biosynthesis involves the conversion of D-glucose-6-phosphate  
396 to Ins(3)P<sub>1</sub> by MIPS [19], which is followed by a series of phosphorylation steps, leading to  
397 the formation of InsP<sub>6</sub> (S1 Fig). However, biochemical pathways leading to the conversion of  
398 Ins(3)P<sub>1</sub> to InsP<sub>4</sub>, and the enzymes involved are very complex and not yet fully understood in  
399 plants [3].

400 Understanding the genetic basis of low PA phenotype is important for developing  
401 cultivars with low PA content in seeds. Therefore, we obtained the low PA mutant cultivar  
402 ‘Sanggol’ from Kangwon National University, Republic of Korea [31, 46]. In this study,  
403 Sanggol showed relatively poor agronomic performance compared with the wild cultivar Ilpum  
404 (Table 4). These results are in agreement with previous studies showing superior agronomic  
405 performance of wild cultivars compared with the low PA mutants [5, 14]. Edwards et al. [41]  
406 report an association between *Lpa1* locus and grain chalkiness in rice. Similarly, the Sanggol  
407 showed high percentage of chalky grains compared with Ilpum, indicating that the low PA  
408 phenotype interacts with grain chalkiness. Thus, results of this study and previous studies  
409 suggest that the *lpa* allele plays an important role in determining the yield potential and seed  
410 quality of rice.

411 Phenotypic analysis using P<sup>31</sup> NMR spectroscopy showed a significant reduction in PA  
412 content and an increase in P<sub>i</sub> content in Sanggol seeds (Table 5). Expression analysis of PA  
413 biosynthetic genes in spikelets of the wild-type cultivar Ilpum at 5 DAF indicated that 15 genes  
414 from the lipid independent pathway were possibly responsible for the low PA content in

415 Sanggol (Fig 3). Our data showed that a point mutation in the *OsLpa1* locus was associated  
416 with low PA content in Sanggol seeds. Previous studies have also shown that rice low PA  
417 mutants exhibit a reduction in seed PA content because of SNPs [25, 30]. Candidate gene  
418 sequencing (Fig 4) and co-segregation analysis (Fig 7 and Table 6) confirmed that a new single  
419 recessive allele of *Lpa1*, designated as *lpa1-3*, was responsible for the low PA phenotype of  
420 Sanggol *lpa* mutant because of a C/T SNP located at nucleotide position 623 in *OsLpa1*,  
421 resulting in a single amino acid substitution (Thr208Ile). In a previous study, the *japonica*  
422 mutant ‘KBNT *lpa1-1*’ exhibited a 28% reduction in seed PA content because of a SNP (C/G  
423 to T/A), resulting in a nonsense mutation at amino acid position 409 whereas the DR1331-2  
424 (*lpa1-2*) mutant showed a 48% reduction in seed PA content because of a single nucleotide  
425 deletion (T/A) at position 313, causing a frame shift mutation [22]. In addition, molecular  
426 characterization of the *indica* mutant ‘Os-*lpa*-XQZ-1’ shows the deletion of a 1,475 bp  
427 fragment in *lpa1-1*, resulting in a 38% reduction in seed PA content [30].

428         The *OsLpa1* gene encodes three splice variants, all of which are expressed in seeds,  
429 suggesting that these variants play different roles in rice seed development [22, 35]. However,  
430 RT-PCR analysis of *OsLpa1* locus revealed that *OsLpa1-3.1* expression exhibited both  
431 vegetative and seed specificity, which indicates a major role of *OsLpa1-3.1* in PA biosynthesis;  
432 however, *OsLpa1-3.2* and *OsLpa1-3.3* showed significant and dynamic changes at 15 DAG  
433 and 5 DAF, respectively (Fig 5A), suggesting that these variants play important roles in  
434 seedling growth and seed development, respectively. This finding is consistent with a previous  
435 study in rice [52]. Additionally, we investigated the expression of *OsLpa1* paralog  
436 (Os09g0572200) and a IPK2 kinase is specific for the lipid independent pathway, *OsIpk2*  
437 (Os02g0523800), in spikelets at 5 DAF, to provide an alternative explanation for the low level  
438 of PA in Sanggol mutant seeds. However, expression analysis suggests that the *OsLpa1* paralog  
439 gene involved in PA biosynthesis in Sanggol (Fig 5B).

440 According to a previous study, *OsLpa1* shows a weak homology to 2-PGK found in  
441 *Methanothermobacter ferredoxin* [22]. 2,3-bisphosphoglycerate (2,3-BPG), derived from 2-PGK, is a  
442 strong inhibitor of inositol polyphosphate 5-phosphatases [53]; thus, removing this inhibition  
443 may degrade inositol polyphosphate intermediates, causing a reduction in seed PA content in  
444 low PA mutants [22, 54]. Based on the structural similarity among substrates and products of  
445 *OsLpa1* and 2-PGK, it is possible that *Lpa1* protein functions as a kinase [3]. Additionally, our  
446 results revealed a single amino acid substitution (Thr208Ile) in the kinase domain of *Lpa1* in  
447 Sanggol. The *Lpa1* gene encodes Ins(3)P<sub>1</sub> kinase, which phylogenetically groups with the *Lpa*  
448 clade. From the molecular docking analysis, it is evident that Ins(3)P<sub>1</sub> binds to the *Lpa1* protein,  
449 with ATP as a cofactor for catalysis (Fig 8A). Overall, these results suggest that *Lpa1* protein  
450 functions as a kinase, and is probably involved in the conversion of Ins(3)P<sub>1</sub> to *myo*-inositol  
451 3,4-bisphosphate [Ins (3,4) P<sub>2</sub>].

452 In *Arabidopsis*, aspartic acid (Asp) to alanine (Ala) substitutions at amino acid positions  
453 98 and 100 (Asp98Ala and Asp100Ala) in two genes encoding inositol polyphosphate kinases  
454 result in inactive enzymes and LPA phenotypes [55]. Similarly, analysis of phosphorylation  
455 deficient mutants in yeast and human shows decreased MIPS activity compared with wild- type  
456 because of amino acid substitutions at phosphorylation sites [48]. Several studies of various  
457 kinases and other metabolic enzymes show reduced enzyme activity of the mutant protein  
458 because of Thr and other amino acid substitutions at phosphorylation sites [47, 56-60].  
459 Therefore, we speculate that a point mutation (C623T) causing Thr208Ile amino acid  
460 substitution in the loop adjacent to the entry site of the binding pocket of *OsLpa1* is responsible  
461 for the altered enzyme activity of *OsLpa1-3.1*, resulting in reduced PA biosynthesis in Sanggol  
462 mutant seeds. Additionally, enzyme activity analysis is necessary to confirm the association of  
463 Thr208Ile substitution with the reduction in seed PA content in Sanggol low PA mutant cultivar.

464 Previous findings suggest that climate change and elevated CO<sub>2</sub> levels negatively affect  
465 micronutrient bioavailability and total P in grains [15, 16]. However, rising CO<sub>2</sub> levels are  
466 likely to increase the yield of rice crop because of the stimulation of photosynthetic rate [61].  
467 A 1.2% increase in seed PA content under elevated CO<sub>2</sub> conditions has been reported in rice  
468 [62]. In addition, crop plants need more P under elevated CO<sub>2</sub> levels [63]. Soil P also exhibits  
469 a positive correlation with seed PA content in rice [64]. Limited information is available on  
470 how climate change affects seed PA content, and further studies are needed to avoid nutrient  
471 deficiencies. Reducing the seed PA content and increasing P uptake by crop plants should be a  
472 major focus of future crop breeding programs. The results of Sanggol mutant reported in this  
473 study will facilitate the development of new low PA lines with increased seed micronutrient  
474 bioavailability, high P uptake, better nutrition, and enhanced agronomic performance, despite  
475 elevated CO<sub>2</sub> levels, using marker assisted introgression of the *lpa1-3* allele into elite rice  
476 varieties.

477

## 478 **Funding**

479 This work was supported by a Grant from the Next-Generation BioGreen 21 Program (Plant  
480 Molecular Breeding Center number PJ013165), Rural Development Administration, Republic  
481 of Korea. The funder had no role in study design, data collection and analysis, decision to  
482 publish, or preparation of the manuscript.

483

## 484 **Competing interests**

485 The authors have declared that no competing interests exist.

486



## 487 **Acknowledgments**

488 This work was supported by a Grant from the Next-Generation BioGreen 21 Program (Plant  
489 Molecular Breeding Center number PJ013165), Rural Development Administration, Republic  
490 of Korea.

491

## 492 **Author Contributions**

493 **Conceptualization:** Kishor Doddanakatte Shivaramgowda, Hee-Jong Koh

494 **Data curation:** Kishor Doddanakatte Shivaramgowda, Hee-Jong Koh

495 **Formal analysis:** Kishor Doddanakatte Shivaramgowda

496 **Funding acquisition:** Hee-Jong Koh

497 **Methodology:** Kishor Doddanakatte Shivaramgowda, Choonseok Lee, Hee-Jong Koh

498 **Project administration:** Hee-Jong Koh

499 **Resources:** Hee-Jong Koh, Soon-Kwan Hong, Jin-Kwan Ham

500 **Software:** Kishor Doddanakatte Shivaramgowda, Dongryung Lee, Jeonghwan Seo

501 **Supervision:** Hee-Jong Koh

502 **Validation:** Choonseok Lee

503 **Visualization:** Kishor Doddanakatte Shivaramgowda, Choonseok Lee

504 **Writing ± original draft:** Kishor Doddanakatte Shivaramgowda

505 **Writing, review & editing:** Kishor Doddanakatte Shivaramgowda, Choonseok Lee, Jelli

506 Venkatesh, Zhuo Jin, Dongryung Lee, Jeonghwan Seo, Joong Hyoun Chin, Hee-Jong Koh

507

## 508 **References**

- 509 1. Raboy V. Accumulation and Storage of Phosphate and Minerals. In: Larkins BA, Vasil  
510 IK, editors. Cellular and Molecular Biology of Plant Seed Development. Dordrecht:

- 511 Springer Netherlands; 1997. p. 441-77. doi:[https://doi.org/10.1007/978-94-015-8909-](https://doi.org/10.1007/978-94-015-8909-3_12)  
512 [3\\_12](https://doi.org/10.1007/978-94-015-8909-3_12).
- 513 2. Marounek M, Skřivan M, Rosero O, Rop O. Intestinal and total tract phytate  
514 digestibility and phytase activity in the digestive tract of hens fed a wheat-maize-  
515 soyabean diet. *J. Anim. Feed Sci.* 2010;19(3):430–439.
- 516 3. Raboy V. Approaches and challenges to engineering seed phytate and total phosphorus.  
517 *Plant Science.* 2009;177(4):281-96. doi: <https://doi.org/10.1016/j.plantsci.2009.06.012>.
- 518 4. Perera I, Seneweera S, Hirotsu N. Manipulating the Phytic Acid Content of Rice Grain  
519 Toward Improving Micronutrient Bioavailability. *Rice.* 2018;11(1):4. doi:  
520 [10.1186/s12284-018-0200-y](https://doi.org/10.1186/s12284-018-0200-y).
- 521 5. Raboy V, Gerbasi PF, Young KA, Stoneberg SD, Pickett SG, Bauman AT, et al. Origin  
522 and Seed Phenotype of Maize low phytic acid 1-1 and low phytic acid 2-1. *Plant*  
523 *Physiology.* 2000;124(1):355-68. PMID: [PMC59149](https://pubmed.ncbi.nlm.nih.gov/14523526/).
- 524 6. Pilu R, Panzeri D, Gavazzi G, Rasmussen SK, Consonni G, Nielsen E. Phenotypic,  
525 genetic and molecular characterization of a maize low phytic acid mutant (lpa241).  
526 *TAG Theoretical and applied genetics Theoretische und angewandte Genetik.*  
527 2003;107(6):980-7. Epub 2003/10/03. doi:[10.1007/s00122-003-1316-y](https://doi.org/10.1007/s00122-003-1316-y). PMID:  
528 [14523526](https://pubmed.ncbi.nlm.nih.gov/14523526/).
- 529 7. Dorsch JA, Cook A, Young KA, Anderson JM, Bauman AT, Volkmann CJ, et al. Seed  
530 phosphorus and inositol phosphate phenotype of barley low phytic acid genotypes.  
531 *Phytochemistry.* 2003;62(5):691-706. Epub 2003/03/07. PMID: [12620321](https://pubmed.ncbi.nlm.nih.gov/12620321/).
- 532 8. Hitz WD, Carlson TJ, Kerr PS, Sebastian SA. Biochemical and Molecular  
533 Characterization of a Mutation That Confers a Decreased Raffinosaccharide and Phytic  
534 Acid Phenotype on Soybean Seeds. *Plant Physiology.* 2002;128(2):650-60. doi:  
535 [10.1104/pp.010585](https://doi.org/10.1104/pp.010585). PMID: [PMC148927](https://pubmed.ncbi.nlm.nih.gov/148927/).

- 536 9. Liu QL, Xu XH, Ren XL, Fu HW, Wu DX, Shu QY. Generation and characterization  
537 of low phytic acid germplasm in rice (*Oryza sativa* L.). TAG Theoretical and applied  
538 genetics Theoretische und angewandte Genetik. 2007;114(5):803-14. Epub 2007/01/16.  
539 doi: [10.1007/s00122-006-0478-9](https://doi.org/10.1007/s00122-006-0478-9). PMID: [17219209](https://pubmed.ncbi.nlm.nih.gov/17219209/).
- 540 10. Guttieri M, Bowen D, Dorsch JA, Raboy V, Souza E. Erratum: Identification and  
541 characterization of a low phytic acid wheat. Crop Science.2004;44(2):418-424.
- 542 11. Larson SR, Rutger JN, Young KA, Raboy V. Isolation and Genetic Mapping of a Non-  
543 Lethal Rice (*Oryza sativa* L.) low phytic acid 1 Mutation This work was supported by  
544 the USDA-ARS and by the USDA's National Research Initiative Competitive Grants  
545 Program Award no. 97-35300-4421. Crop Science. 2000;40(5):1397-405. doi:  
546 [10.2135/cropsci2000.4051397x](https://doi.org/10.2135/cropsci2000.4051397x).
- 547 12. Shi J, Wang H, Wu Y, Hazebroek J, Meeley RB, Ertl DS. The maize low-phytic acid  
548 mutant lpa2 is caused by mutation in an inositol phosphate kinase gene. Plant Physiol.  
549 2003;131(2):507-15. Epub 2003/02/15. doi: [10.1104/pp.014258](https://doi.org/10.1104/pp.014258). PMID: [12586875](https://pubmed.ncbi.nlm.nih.gov/12586875/).
- 550 13. Shi J, Wang H, Hazebroek J, Ertl DS, Harp T. The maize low-phytic acid 3 encodes a  
551 myo-inositol kinase that plays a role in phytic acid biosynthesis in developing seeds.  
552 The Plant journal : for cell and molecular biology. 2005;42(5):708-19. doi:  
553 [10.1111/j.1365-313X.2005.02412.x](https://doi.org/10.1111/j.1365-313X.2005.02412.x). PMID: [15918884](https://pubmed.ncbi.nlm.nih.gov/15918884/).
- 554 14. Zhao H-J, Liu Q-L, Fu H-W, Xu X-H, Wu D-X, Shu Q-Y. Effect of non-lethal low  
555 phytic acid mutations on grain yield and seed viability in rice. Field Crops Research.  
556 2008; 108: 206-211.
- 557 15. Seneweera S, Blakeney A, Milham P, S. Basra A, Barlow E, Conroy J. Influence of  
558 rising atmospheric CO<sub>2</sub> and phosphorus nutrition on the grain yield and quality of rice  
559 (*Oryza sativa* cv. Jarrah). Cereal Chemistry.1996. 73(2): 239-43.

- 560 16. Dietterich LH, Zanobetti A, Kloog I, Huybers P, Leakey ADB, Bloom AJ, et al. Impacts  
561 of elevated atmospheric CO<sub>2</sub> on nutrient content of important food crops. Scientific  
562 Data. 2015;2:150036. doi: [10.1038/sdata.2015.36](https://doi.org/10.1038/sdata.2015.36).
- 563 17. Sparvoli F, Cominelli E. Seed Biofortification and Phytic Acid Reduction: A Conflict  
564 of Interest for the Plant?. Plants. 2015;4(4):728. doi: [10.3390/plants4040728](https://doi.org/10.3390/plants4040728).
- 565 18. Suzuki M, Tanaka K, Kuwano M, Yoshida K. Expression pattern of inositol phosphate-  
566 related enzymes in rice (*Oryza sativa* L.): Implications for the phytic acid biosynthetic  
567 pathway. Gene. 2007. 405(1-2):55-64.
- 568 19. Mitsuhashi N, Kondo M, Nakaune S, Ohnishi M, Hayashi M, Hara-Nishimura I, et al.  
569 Localization of myo-inositol-1-phosphate synthase to the endosperm in developing  
570 seeds of Arabidopsis. Journal of Experimental Botany. 2008;59(11):3069-76. doi:  
571 [10.1093/jxb/ern161](https://doi.org/10.1093/jxb/ern161). PMID: [PMC2504351](https://pubmed.ncbi.nlm.nih.gov/17111111/).
- 572 20. Stevenson-Paulik J, Bastidas RJ, Chiou S-T, Frye RA, York JD. Generation of phytate-  
573 free seeds in *Arabidopsis* through disruption of inositol polyphosphate  
574 kinases. Proceedings of the National Academy of Sciences of the United States of  
575 America. 2005;102(35):12612-7. doi: [10.1073/pnas.0504172102](https://doi.org/10.1073/pnas.0504172102).
- 576 21. Kim SI, Andaya CB, Newman JW, Goyal SS, Tai TH. Isolation and characterization of  
577 a low phytic acid rice mutant reveals a mutation in the rice orthologue of maize MIK.  
578 Theoretical and Applied Genetics. 2008;117(8):1291. doi: [10.1007/s00122-008-0863-](https://doi.org/10.1007/s00122-008-0863-7)  
579 [7](https://doi.org/10.1007/s00122-008-0863-7).
- 580 22. Kim SI, Andaya CB, Goyal SS, Tai TH. The rice OsLpa1 gene encodes a novel protein  
581 involved in phytic acid metabolism. Theoretical and Applied Genetics.  
582 2008;117(5):769-79. doi: [10.1007/s00122-008-0818-z](https://doi.org/10.1007/s00122-008-0818-z).
- 583 23. Ali N, Paul S, Gayen D, Sarkar SN, Datta K, Datta SK. Development of Low Phytate  
584 Rice by RNAi Mediated Seed-Specific Silencing of Inositol 1,3,4,5,6-

- 585 Pentakisphosphate 2-Kinase Gene (IPK1). PLOS ONE. 2013;8(7):e68161. doi:  
586 [10.1371/journal.pone.0068161](https://doi.org/10.1371/journal.pone.0068161).
- 587 24. Ali N, Paul S, Gayen D, Sarkar SN, Datta SK, Datta K. RNAi mediated down regulation  
588 of myo-inositol-3-phosphate synthase to generate low phytate rice. Rice. 2013;6:12. doi:  
589 [10.1186/1939-8433-6-12](https://doi.org/10.1186/1939-8433-6-12). PMID: [PMC4883737](https://pubmed.ncbi.nlm.nih.gov/24883737/).
- 590 25. Kim S-I, Tai TH. Identification of novel rice low phytic acid mutations via TILLING  
591 by sequencing. Molecular Breeding. 2014;34(4):1717-29. doi: [10.1007/s11032-014-](https://doi.org/10.1007/s11032-014-0127-y)  
592 [0127-y](https://doi.org/10.1007/s11032-014-0127-y).
- 593 26. Xu XH, Zhao HJ, Liu QL, Frank T, Engel KH, An G, et al. Mutations of the multi-drug  
594 resistance-associated protein ABC transporter gene 5 result in reduction of phytic acid  
595 in rice seeds. TAG Theoretical and applied genetics Theoretische und angewandte  
596 Genetik. 2009;119(1):75-83. Epub 2009/04/17. doi: [10.1007/s00122-009-1018-](https://doi.org/10.1007/s00122-009-1018-1)  
597 [1](https://doi.org/10.1007/s00122-009-1018-1). PMID: [19370321](https://pubmed.ncbi.nlm.nih.gov/19370321/).
- 598 27. Zhao HJ, Cui HR, Xu XH, Tan YY, Fu JJ, Liu GZ, et al. Characterization of OsmIK in  
599 a rice mutant with reduced phytate content reveals an insertion of a rearranged  
600 retrotransposon. TAG Theoretical and applied genetics Theoretische und angewandte  
601 Genetik. 2013;126(12):3009-20. Epub 2013/09/18. doi: [10.1007/s00122-013-2189-3](https://doi.org/10.1007/s00122-013-2189-3).  
602 PMID: [24042572](https://pubmed.ncbi.nlm.nih.gov/24042572/).
- 603 28. Kim S-I, Tai TH. Genetic analysis of two OsLpa1-like genes in Arabidopsis reveals  
604 that only one is required for wild-type seed phytic acid levels. Planta.  
605 2010;232(5):1241-50. doi: [10.1007/s00425-010-1243-5](https://doi.org/10.1007/s00425-010-1243-5).
- 606 29. Shi J, Wang H, Schellin K, Li B, Faller M, Stoop JM, et al. Embryo-specific silencing  
607 of a transporter reduces phytic acid content of maize and soybean seeds. Nature  
608 Biotechnology. 2007;25:930.

- 609 30. Zhao H-J, Liu Q-L, Ren X-L, Wu D-X, Shu Q-Y. Gene identification and allele-specific  
610 marker development for two allelic low phytic acid mutations in rice (*Oryza sativa* L.).  
611 *Molecular Breeding*. 2008;22(4):603-12. doi: [10.1007/s11032-008-9202-6](https://doi.org/10.1007/s11032-008-9202-6).
- 612 31. Li C-Y, Park D-S, Won S-R, Hong S-K, Ham J-K, Choi J-K, et al. Food chemical  
613 properties of low-phytate rice cultivar, Sang-gol. *Journal of Cereal Science*.  
614 2008;47(2):262-5. doi: <https://doi.org/10.1016/j.jcs.2007.04.012>.
- 615 32. Gao Y, Shang C, Maroof S, Biyashev R, Grabau E, Kwanyuen P, Burton JW, Buss GR.  
616 A Modified Colorimetric Method for Phytic Acid Analysis in Soybean. *Crop*  
617 *Science*. 2007;47:1797–1803. doi: [10.2135/cropsci2007.03.0122](https://doi.org/10.2135/cropsci2007.03.0122).
- 618 33. Cade-Menun BJ, Carter MR, James DC, Liu CW. Phosphorus Forms and Chemistry in  
619 the Soil Profile under Long-Term Conservation Tillage: A Phosphorus-31 Nuclear  
620 Magnetic Resonance Study All rights reserved. No part of this periodical may be  
621 reproduced or transmitted in any form or by any means, electronic or mechanical,  
622 including photocopying, recording, or any information storage and retrieval system,  
623 without permission in writing from the publisher. *Journal of Environmental Quality*.  
624 2010;39:1647-56. doi: [10.2134/jeq2009.0491](https://doi.org/10.2134/jeq2009.0491).
- 625 34. Nanganoa LT, Njukeng JN. Phosphorus Speciation by <sup>31</sup>P NMR Spectroscopy in Leaf  
626 Litters and Crop Residues from Para Rubber, Cocoa, Oil Palm, and Banana Plantations  
627 in the Humid Forest Zone of Cameroon. *Journal of Applied Chemistry*. 2018;2018:8.  
628 doi: [10.1155/2018/6290236](https://doi.org/10.1155/2018/6290236).
- 629 35. Sakai H, Lee SS, Tanaka T, Numa H, Kim J, Kawahara Y, et al. Rice Annotation Project  
630 Database (RAP-DB): An Integrative and Interactive Database for Rice Genomics. *Plant*  
631 *and Cell Physiology*. 2013;54(2):e6-e. doi: [10.1093/pcp/pcs183](https://doi.org/10.1093/pcp/pcs183).
- 632 36. Lee H-S, Lee D-H, Cho HK, Kim SH, Auh JH, Pai H-S. InsP<sub>6</sub>-Sensitive  
633 Variants of the Gle1 mRNA Export Factor Rescue Growth and Fertility Defects of the

- 634           <em>ipk1</em> Low-Phytic-Acid Mutation in Arabidopsis. The Plant Cell.  
635           2015;27(2):417-31. doi: [10.1105/tpc.114.132134](https://doi.org/10.1105/tpc.114.132134).
- 636       37. Sato Y, Takehisa H, Kamatsuki K, Minami H, Namiki N, Ikawa H, et al. RiceXPro  
637           Version 3.0: expanding the informatics resource for rice transcriptome. Nucleic Acids  
638           Research. 2013;41(D1):D1206-D13. doi: [10.1093/nar/gks1125](https://doi.org/10.1093/nar/gks1125).
- 639       38. Choi Y, Sims GE, Murphy S, Miller JR, Chan AP. Predicting the Functional Effect of  
640           Amino Acid Substitutions and Indels. PLOS ONE. 2012;7(10):e46688. doi:  
641           [10.1371/journal.pone.0046688](https://doi.org/10.1371/journal.pone.0046688).38.
- 642       39. Kumar S, Stecher G, Tamura K. MEGA7: Molecular Evolutionary Genetics Analysis  
643           Version 7.0 for Bigger Datasets. Molecular Biology and Evolution. 2016;33(7):1870-  
644           4. doi: [10.1093/molbev/msw054](https://doi.org/10.1093/molbev/msw054).
- 645       40. Kelley LA, Mezulis S, Yates CM, Wass MN, Sternberg MJE. The Phyre2 web portal  
646           for protein modeling, prediction and analysis. Nature Protocols. 2015;10:845. doi:  
647           [10.1038/nprot.2015.053](https://doi.org/10.1038/nprot.2015.053).
- 648       41. Edwards JD, Jackson AK, McClung AM. Genetic architecture of grain chalk in rice  
649           and interactions with a low phytic acid locus. Field Crops Research. 2017;205:116-23.  
650           doi: <https://doi.org/10.1016/j.fcr.2017.01.015>.
- 651       42. Yoshida KT, Wada T, Koyama H, Mizobuchi-Fukuoka R, Naito S. Temporal and  
652           Spatial Patterns of Accumulation of the Transcript of <em>Myo</em>-Inositol-1-  
653           Phosphate Synthase and Phytin-Containing Particles during Seed Development in Rice.  
654           Plant Physiology. 1999;119(1):65-72. doi: [10.1104/pp.119.1.65](https://doi.org/10.1104/pp.119.1.65).
- 655       43. Ogawa M, Tanaka K, Kasai Z. Accumulation of phosphorus, magnesium and potassium  
656           in developing rice grains: followed by electron microprobe X-ray analysis focusing on  
657           the aleurone layer. Plant and Cell Physiology. 1979;20(1):19-27. doi:  
658           [10.1093/oxfordjournals.pcp.a075791](https://doi.org/10.1093/oxfordjournals.pcp.a075791).

- 659 44. Iwai T, Takahashi M, Oda K, Terada Y, Yoshida KT. Dynamic Changes in the  
660 Distribution of Minerals in Relation to Phytic Acid Accumulation during Rice Seed  
661 Development. *Plant Physiology*. 2012;160(4):2007-14. doi: [10.1104/pp.112.206573](https://doi.org/10.1104/pp.112.206573).
- 662 45. Andaya CB, Tai TH. Fine mapping of the rice low phytic acid (Lpa1) locus. *Theoretical*  
663 *and Applied Genetics*. 2005;111(3):489-95. doi: [10.1007/s00122-005-2038-0](https://doi.org/10.1007/s00122-005-2038-0).
- 664 46. Li C-Y, Li H, Choi J-K, Kim H-W, Hong S-K, Xu Z, et al. Physicochemical properties  
665 of low-phytate rice cultivar, Sang-gol. *Journal of the Korean Society for Applied*  
666 *Biological Chemistry*. 2012;55(1):101-4. doi: [10.1007/s13765-012-0017-0](https://doi.org/10.1007/s13765-012-0017-0).
- 667 47. Foltyn VN, Zehl M, Dikopoltsev E, Jensen ON, Wolosker H. Phosphorylation of mouse  
668 serine racemase regulates D-serine synthesis. *FEBS letters*. 2010;584(13):2937-41.  
669 Epub 2010/05/25. doi: [10.1016/j.febslet.2010.05.022](https://doi.org/10.1016/j.febslet.2010.05.022). PMID: [20493854](https://pubmed.ncbi.nlm.nih.gov/20493854/).
- 670 48. Deranieh RM, He Q, Caruso JA, Greenberg ML. Phosphorylation Regulates myo-  
671 Inositol-3-phosphate Synthase: A NOVEL REGULATORY MECHANISM OF  
672 INOSITOL BIOSYNTHESIS. *The Journal of biological chemistry*.  
673 2013;288(37):26822-33. doi: [10.1074/jbc.M113.479121](https://doi.org/10.1074/jbc.M113.479121). PMID: [PMC3772229](https://pubmed.ncbi.nlm.nih.gov/PMC3772229/).
- 674 49. Yuan F-J, Zhao H-J, Ren X-L, Zhu S-L, Fu X-J, Shu Q-Y. Generation and  
675 characterization of two novel low phytate mutations in soybean (*Glycine max* L. Merr.).  
676 *Theoretical and Applied Genetics*. 2007;115(7):945-57. doi: [10.1007/s00122-007-](https://doi.org/10.1007/s00122-007-0621-2)  
677 [0621-2](https://doi.org/10.1007/s00122-007-0621-2).
- 678 50. Panzeri D, Cassani E, Doria E, Tagliabue G, Forti L, Campion B, et al. A defective  
679 ABC transporter of the MRP family, responsible for the bean lpa1 mutation, affects the  
680 regulation of the phytic acid pathway, reduces seed myo-inositol and alters ABA  
681 sensitivity. *The New phytologist*. 2011;191(1):70-83. Epub 2011/03/15. doi:  
682 [10.1111/j.1469-8137.2011.03666.x](https://doi.org/10.1111/j.1469-8137.2011.03666.x). PMID: [21395595](https://pubmed.ncbi.nlm.nih.gov/21395595/).



- 683 51. Ye H, Zhang X-Q, Broughton S, Westcott S, Wu D, Lance R, et al. A nonsense mutation  
684 in a putative sulphate transporter gene results in low phytic acid in barley. *Functional*  
685 *& Integrative Genomics*. 2011;11(1):103-10. doi: [10.1007/s10142-011-0209-4](https://doi.org/10.1007/s10142-011-0209-4).
- 686 52. Lu H-p, Pang W-q, Li W-x, Tan Y-y, Wang Q, Zhao H-j, et al. Tissue-specific  
687 expression, developmentally and spatially regulated alternative splicing, and protein  
688 subcellular localization of OsLpa1 in rice. *Journal of Zhejiang University Science B*.  
689 2016;17(2):100-9. doi: [10.1631/jzus.B1500205](https://doi.org/10.1631/jzus.B1500205). PMID: [PMC4757580](https://pubmed.ncbi.nlm.nih.gov/2757580/).
- 690 53. Downes CP, Mussat MC, Michell RH. The inositol trisphosphate phosphomonoesterase  
691 of the human erythrocyte membrane. *Biochemical Journal*. 1982;203(1):169-77. PMID:  
692 [PMC1158207](https://pubmed.ncbi.nlm.nih.gov/1158207/).
- 693 54. Rasmussen Søren K, Ingvarsen Christina R, Torp Anna M. Mutations in genes  
694 controlling the biosynthesis and accumulation of inositol phosphates in seeds.  
695 *Biochemical Society Transactions*. 2010;38(2):689.
- 696 55. Stevenson-Paulik J, Odom AR, York JD. Molecular and biochemical characterization  
697 of two plant inositol polyphosphate 6-/3-/5-kinases. *The Journal of biological chemistry*.  
698 2002;277(45):42711-8. Epub 2002/09/13. doi: [10.1074/jbc.M209112200](https://doi.org/10.1074/jbc.M209112200). PMID:  
699 [12226109](https://pubmed.ncbi.nlm.nih.gov/12226109/).
- 700 56. Banerjee DK, Carrasquillo EA, Hughey P, Schutzbach JS, Martinez JA, Bakshi K. In  
701 vitro phosphorylation by cAMP-dependent protein kinase up-regulates recombinant  
702 *Saccharomyces cerevisiae* mannosylphosphodolichol synthase. *The Journal of*  
703 *biological chemistry*. 2005;280(6):4174-81. Epub 2004/11/19. doi:  
704 [10.1074/jbc.M406962200](https://doi.org/10.1074/jbc.M406962200). PMID: [15548536](https://pubmed.ncbi.nlm.nih.gov/15548536/).
- 705 57. Smal C, Vertommen D, Bertrand L, Ntamashimikiro S, Rider MH, Van Den Neste E,  
706 et al. Identification of in vivo phosphorylation sites on human deoxycytidine kinase.  
707 Role of Ser-74 in the control of enzyme activity. *The Journal of biological chemistry*.

- 708 2006;281(8):4887-93. Epub 2005/12/20. doi: [10.1074/jbc.M512129200](https://doi.org/10.1074/jbc.M512129200). PMID:  
709 [16361699](https://pubmed.ncbi.nlm.nih.gov/16361699/).
- 710 58. G SY, S KR, Kachhap S, Thakur M, Roy A, Singh B, et al. Eukaryotic-type  
711 serine/threonine kinase mediated phosphorylation at Thr(169) perturbs mycobacterial  
712 guanylate kinase activity. *Bioscience reports*. 2017;37(6). Epub 2017/10/01. doi:  
713 [10.1042/bsr20171048](https://doi.org/10.1042/bsr20171048). PMID: 28963370.
- 714 59. Greif DM, Kou R, Michel T. Site-specific dephosphorylation of endothelial nitric oxide  
715 synthase by protein phosphatase 2A: evidence for crosstalk between phosphorylation  
716 sites. *Biochemistry*. 2002;41(52):15845-53. PMID: [12501214](https://pubmed.ncbi.nlm.nih.gov/12501214/).
- 717 60. Choi H-S, Su W-M, Morgan JM, Han G-S, Xu Z, Karanasios E, et al. Phosphorylation  
718 of Phosphatidate Phosphatase Regulates Its Membrane Association and Physiological  
719 Functions in *Saccharomyces cerevisiae*: IDENTIFICATION OF SER(602), THR(723),  
720 AND SER(744) AS THE SITES PHOSPHORYLATED BY CDC28 (CDK1)-  
721 ENCODED CYCLIN-DEPENDENT KINASE. *The Journal of biological chemistry*.  
722 2011;286(2):1486-98. doi: [10.1074/jbc.M110.155598](https://doi.org/10.1074/jbc.M110.155598). PMID: [PMC3020757](https://pubmed.ncbi.nlm.nih.gov/PMC3020757/).
- 723 61. Hasegawa T, Sakai H, Tokida T, Nakamura H, Zhu C, Usui Y, Yoshimoto M, Fukuoka  
724 M, Wakatsuki H, Katayanagi N, Matsunami T, Kaneta Y, Sato T, Takakai F,  
725 Sameshima R, Okada M, Mae T, Makino A. Rice cultivar responses to elevated CO<sub>2</sub>  
726 at two free-air CO<sub>2</sub> enrichment (FACE) sites in Japan. *Funct Plant Biol*. 2013;7:148–  
727 159. doi: [10.1071/FP12357](https://doi.org/10.1071/FP12357).
- 728 62. Myers SS, Zanolatti A, Kloog I, Huybers P, Leakey AD, Bloom AJ, et al. Increasing  
729 CO<sub>2</sub> threatens human nutrition. *Nature*. 2014;510(7503):139-42. Epub 2014/05/09. doi:  
730 [10.1038/nature13179](https://doi.org/10.1038/nature13179). PMID: [24805231](https://pubmed.ncbi.nlm.nih.gov/24805231/).
- 731 63. Rakshit R, Patra A, Pal D, Kumar DM, Singh R. Effect of Elevated CO<sub>2</sub> and  
732 Temperature on Nitrogen Dynamics and Microbial Activity During Wheat (*Triticum*

733 aestivum L.) Growth on a Subtropical Inceptisol in India. Journal of Agronomy and  
734 Crop Science. 2012;198(6):452-465.

735 64. Rose T, Kretzschmar T, Liu L, Lancaster G, Wissuwa M. Phosphorus Deficiency Alters  
736 Nutrient Accumulation Patterns and Grain Nutritional Quality in Rice. Agronomy.  
737 2016;6(4):52. doi:[10.3390/agronomy6040052](https://doi.org/10.3390/agronomy6040052).

738

739

## 740 **Supporting information**

741 **S1 Fig. Schematic representation of the phytic acid (PA) biosynthetic pathway.** Glu6p,  
742 glucose-6-phosphate; Ins, *myo*-inositol; PtdIns, phosphatidyl inositol; MIPS, *myo*-inositol-3-  
743 phosphate synthase; IMP, *myo*-inositol monophosphatase; MIK, *myo*-inositol kinase; LPA1,  
744 low phytic acid 1; ITPK, inositol 1,3,4-triphosphate 5/6-kinase; IPK1, inositol 1,3,4,5,6  
745 pentakisphosphate 2-kinase; PIS, phosphatidyl inositol phosphate synthase; PI4K,  
746 phosphatidyl inositol 4-kinase; PIP5K, phosphatidyl inositol 4 phosphate 5-kinase; PLC,  
747 phospholipase C; IPK2, inositol 1,4,5-tris-phosphate kinase; MRP, multidrug resistance  
748 protein.

749 **S2 Fig. Structure of *OsLpa1-3.2* and *OsLpa1-3.3* splice variants.** Mutations (C53T) in the  
750 first exon of *OsLpa1-3.2* and *OsLpa1-3.3* are indicated with red lines. Empty boxes represent  
751 5' and 3' untranslated regions (UTRs), black box represents the coding region, and lines  
752 between boxes indicate introns. ATG (start codon) and TGA (stop codon) are shown.

753 **S3 Fig. Statistical analysis of seed PA content among F<sub>2</sub> plants derived from a cross**  
754 **between the mutant cultivar Sanggol and wild-type cultivar Ilpum.** Data were analyzed  
755 using the Student's *t*-test. M, mutant; W, wild-type.

756 **S4 Fig. Statistical analysis of inorganic phosphorous (P<sub>i</sub>) content in seeds of F<sub>2</sub> plants.**  
757 Data were analyzed using the Student's *t*-test. M, mutant; W, wild-type.

758 **S1 Table. Primers used to sequence 16 PA biosynthetic genes in the lipid dependent and**  
759 **independent pathways.**

760

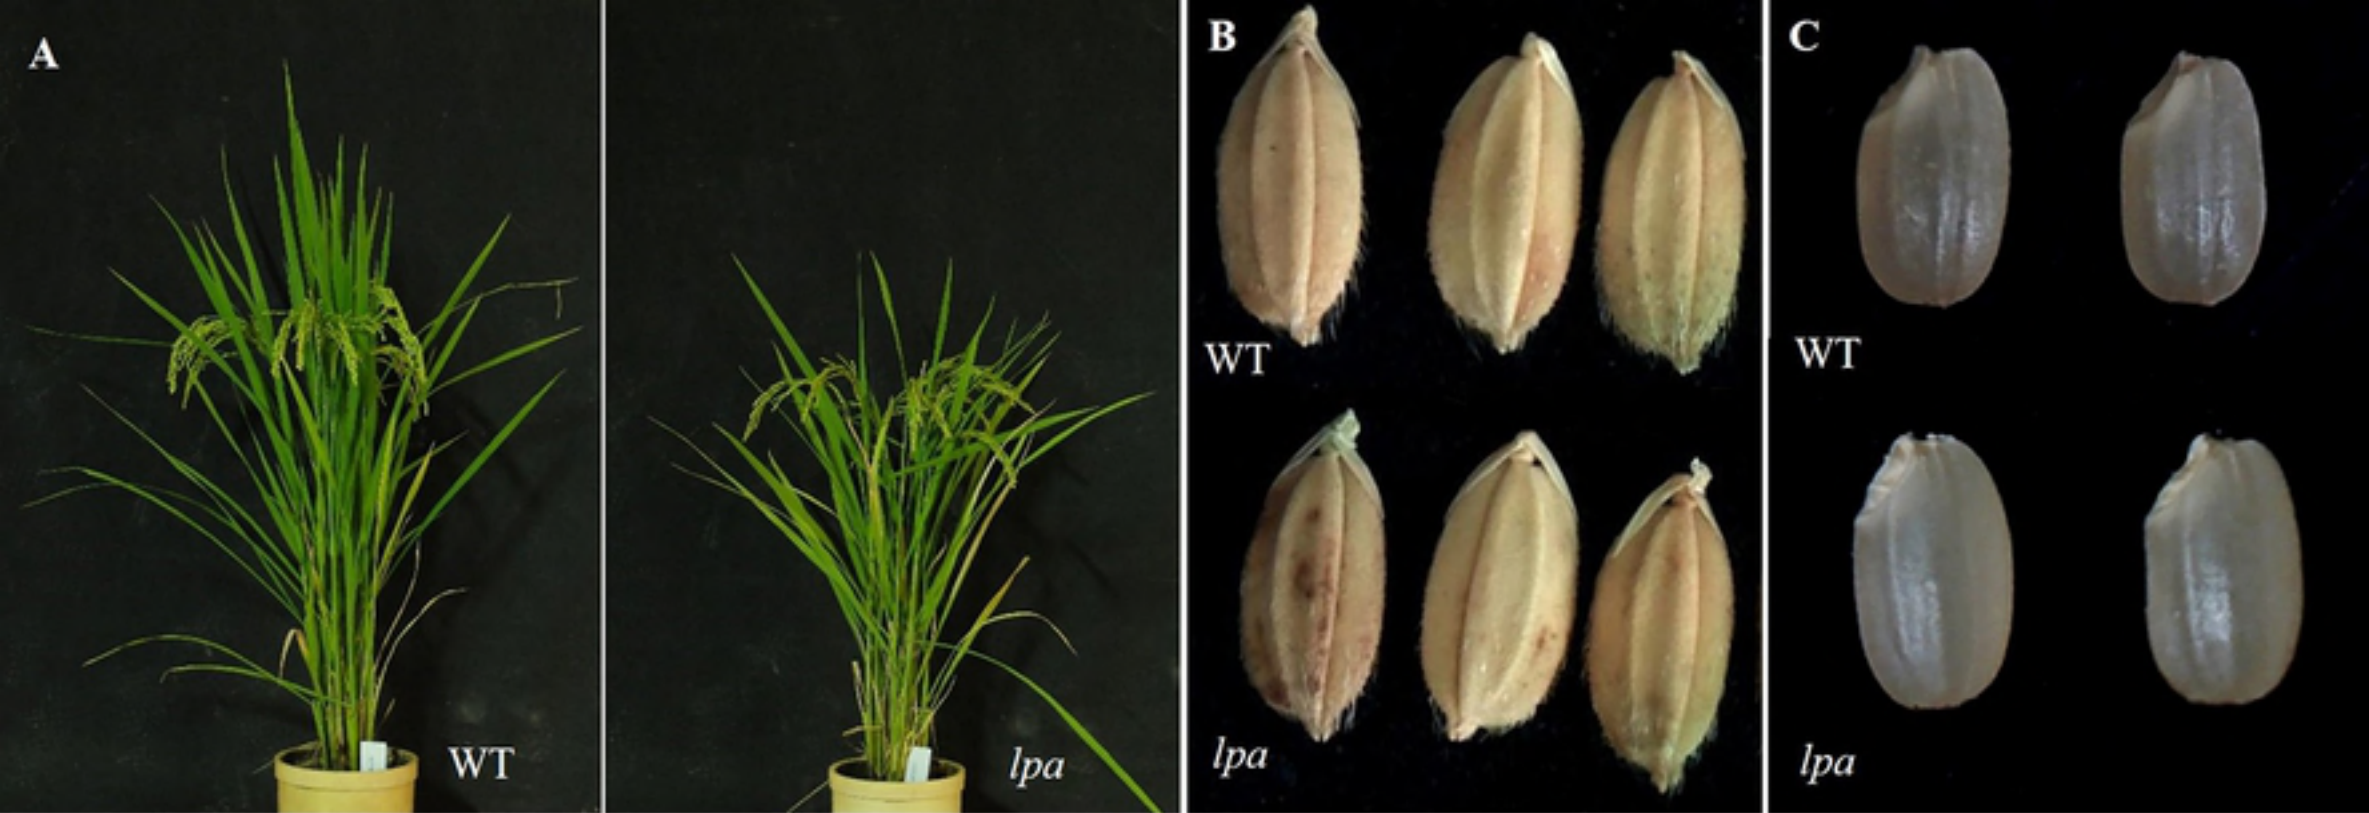

Figure 1

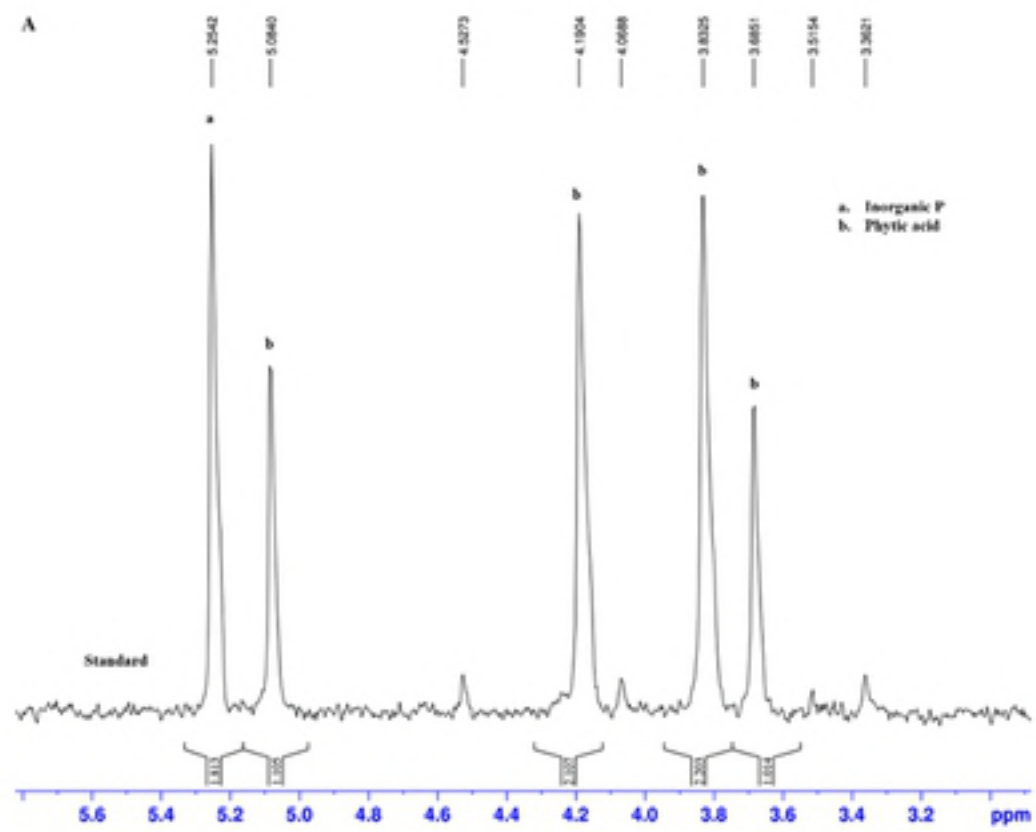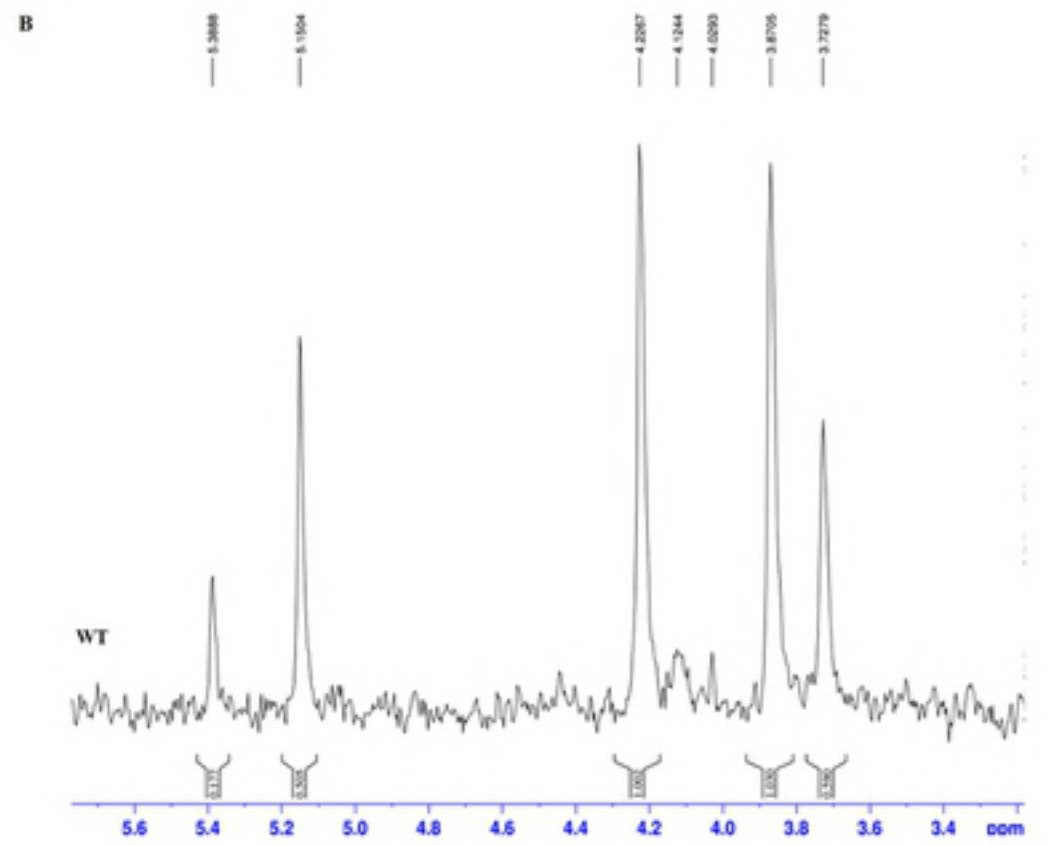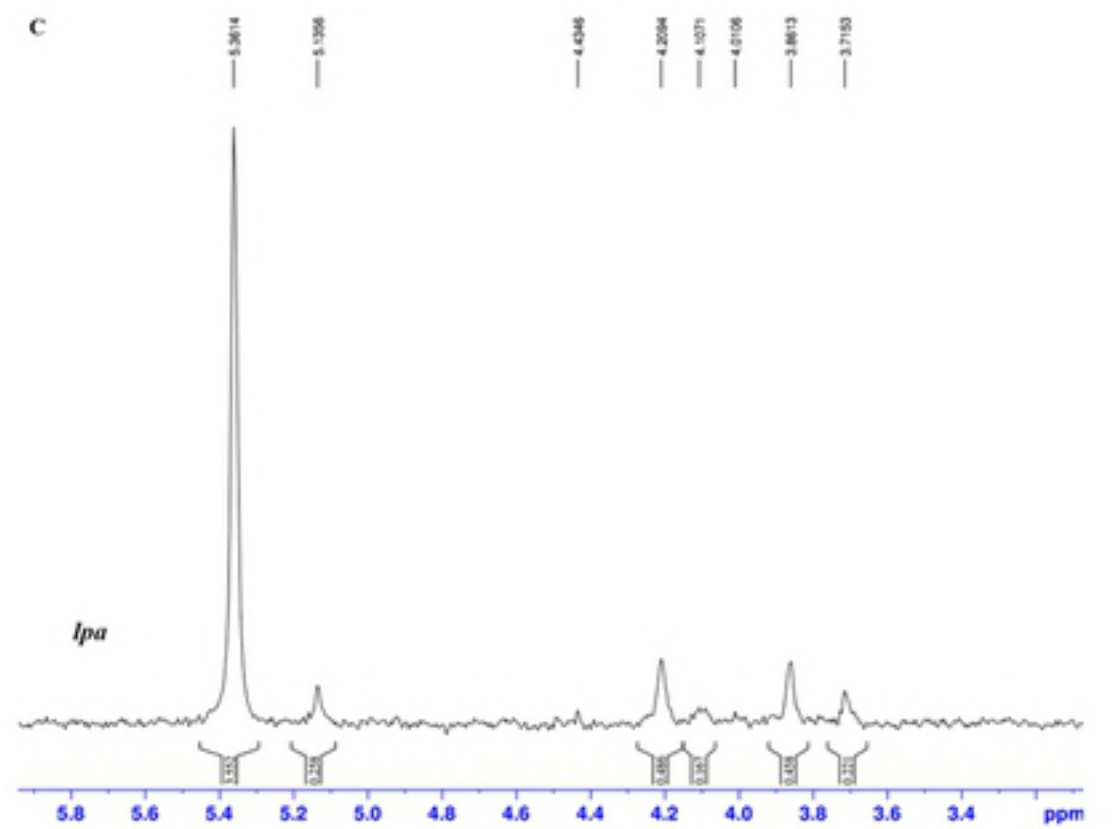

Figure2

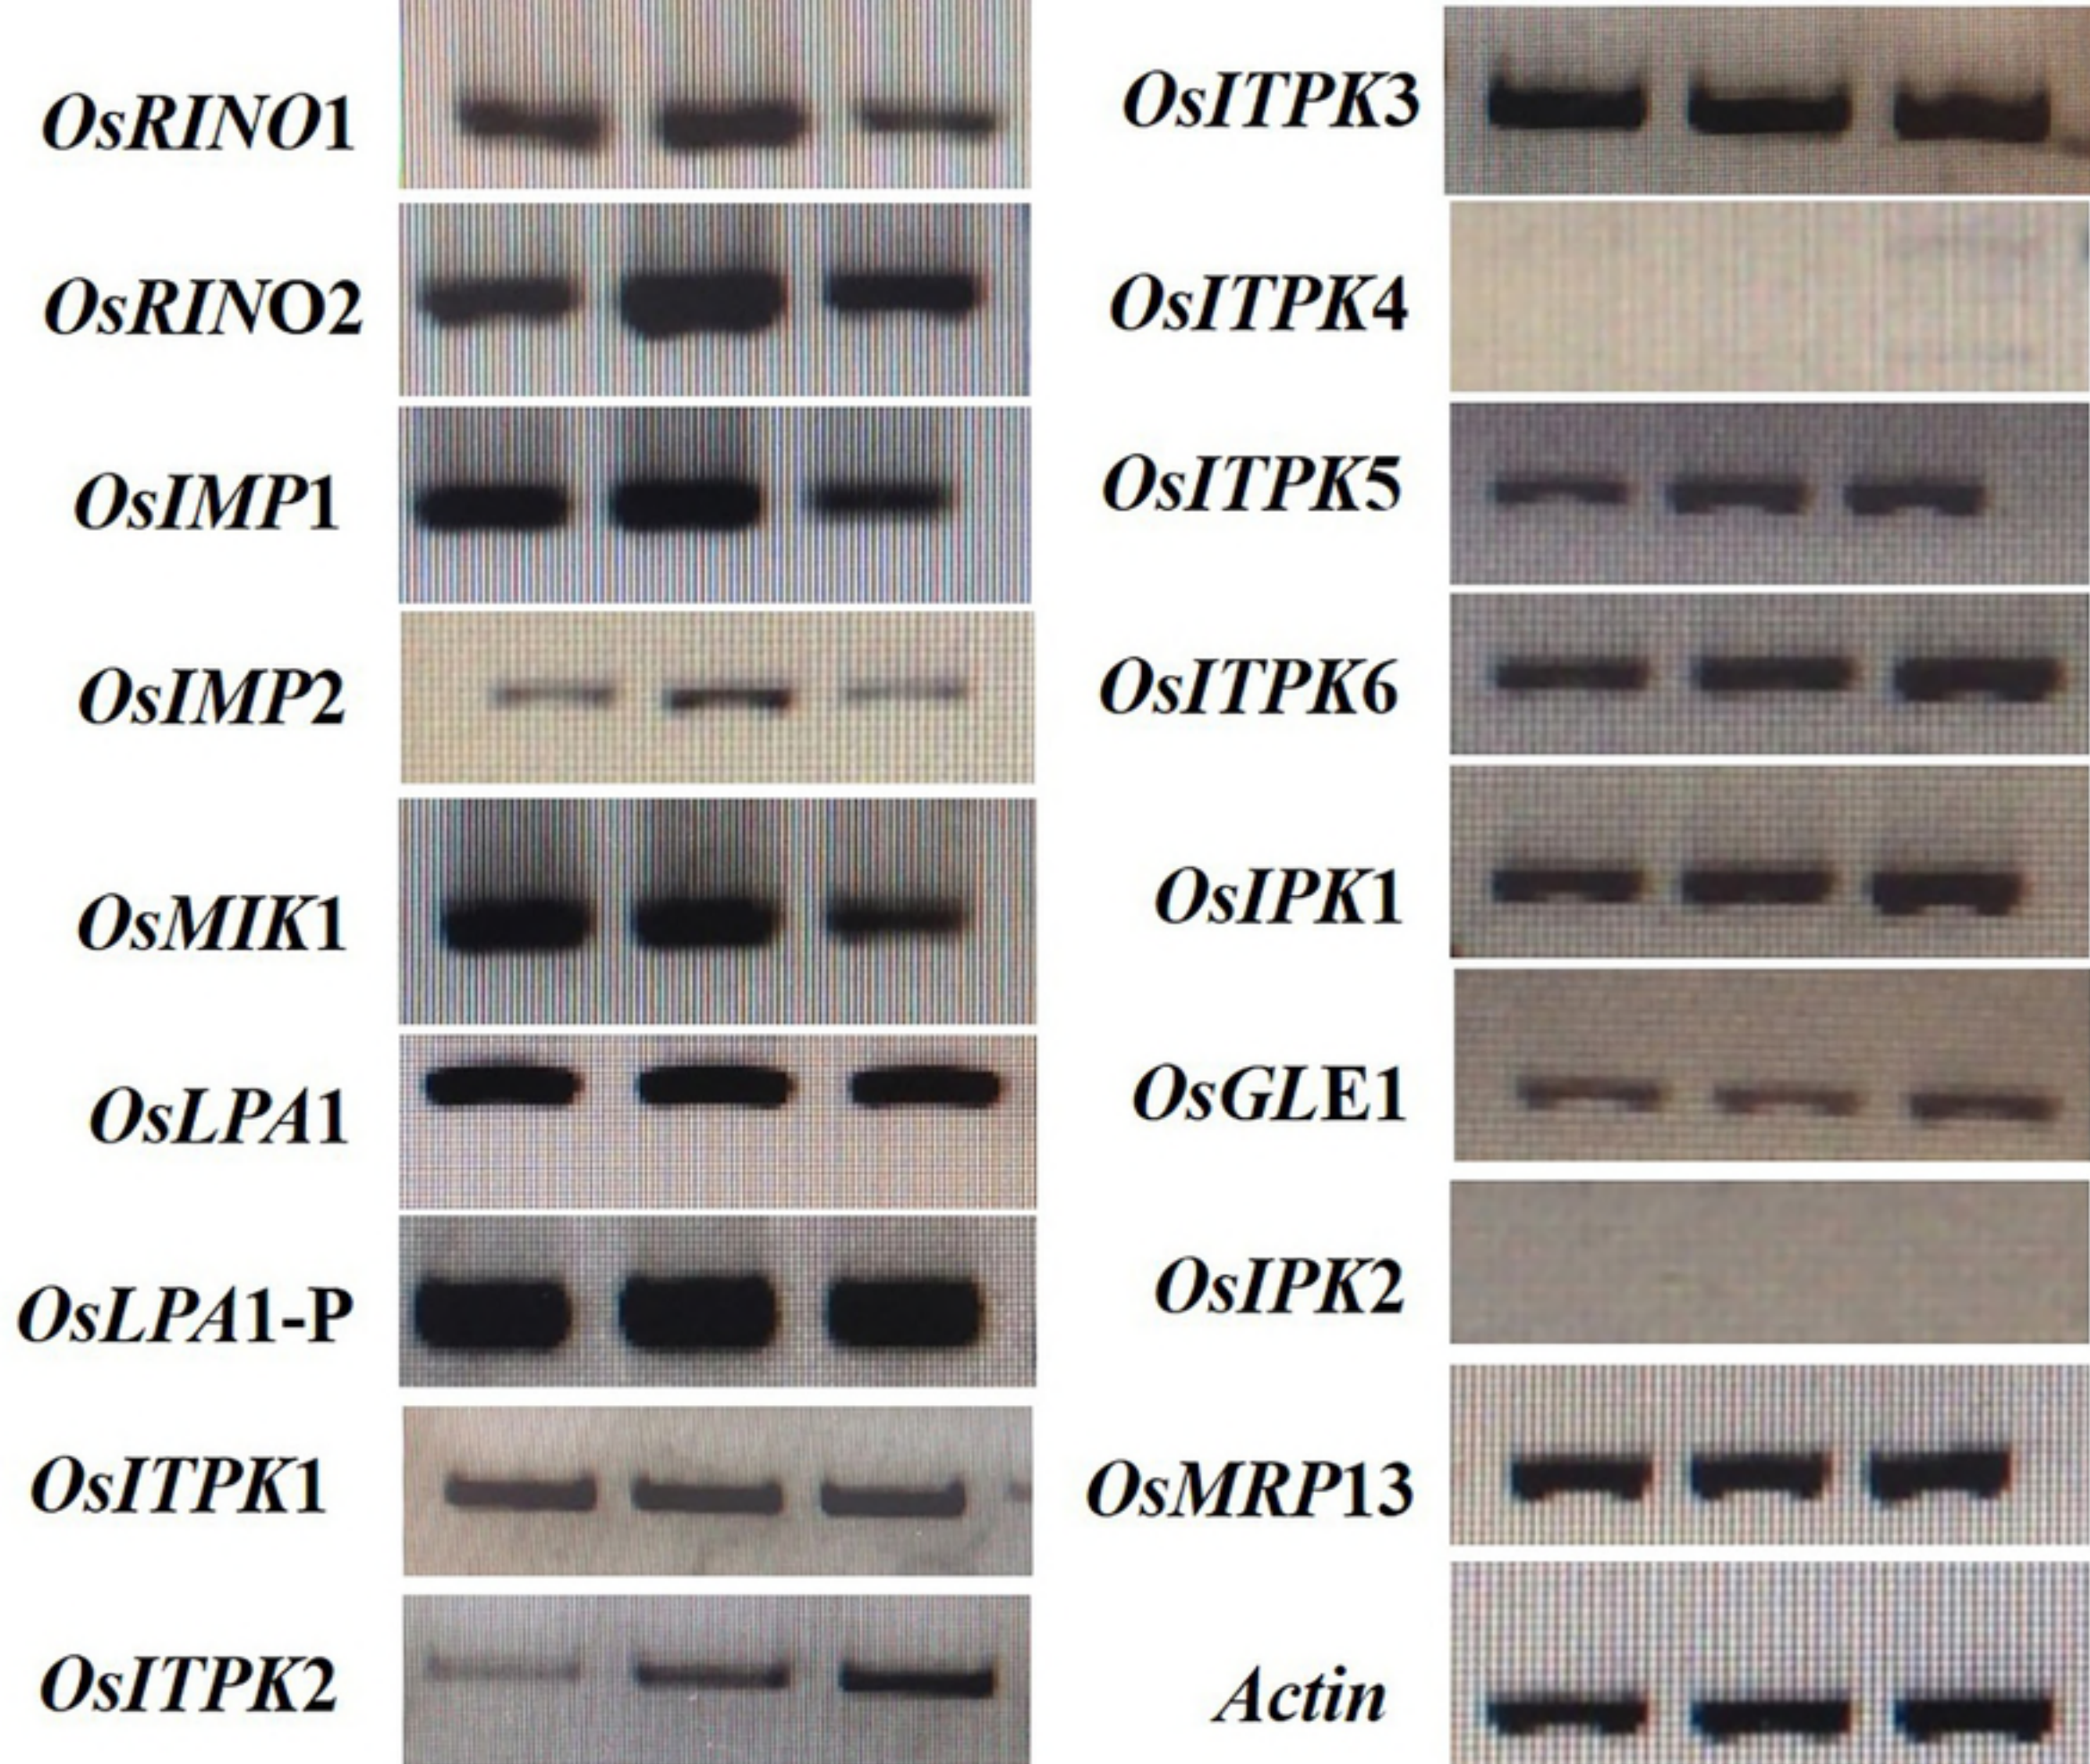

Figure3

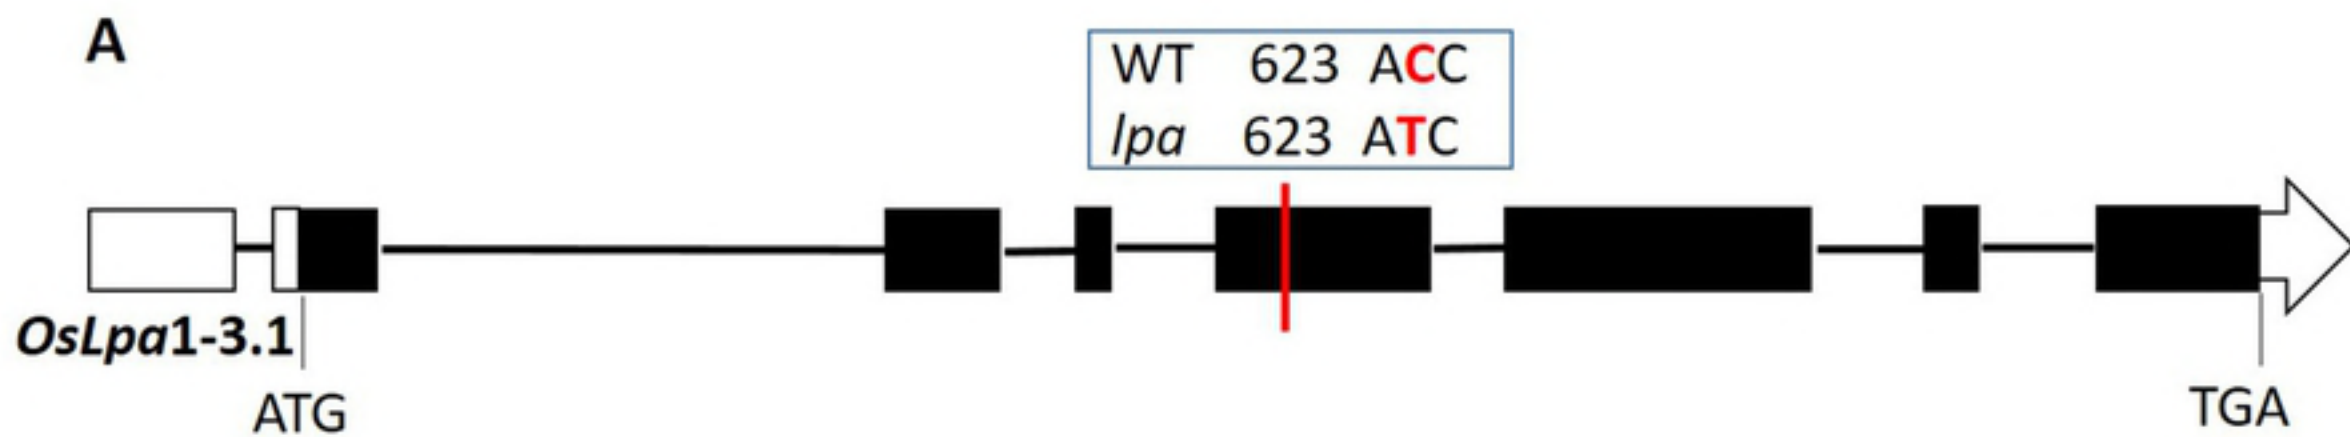

**B**

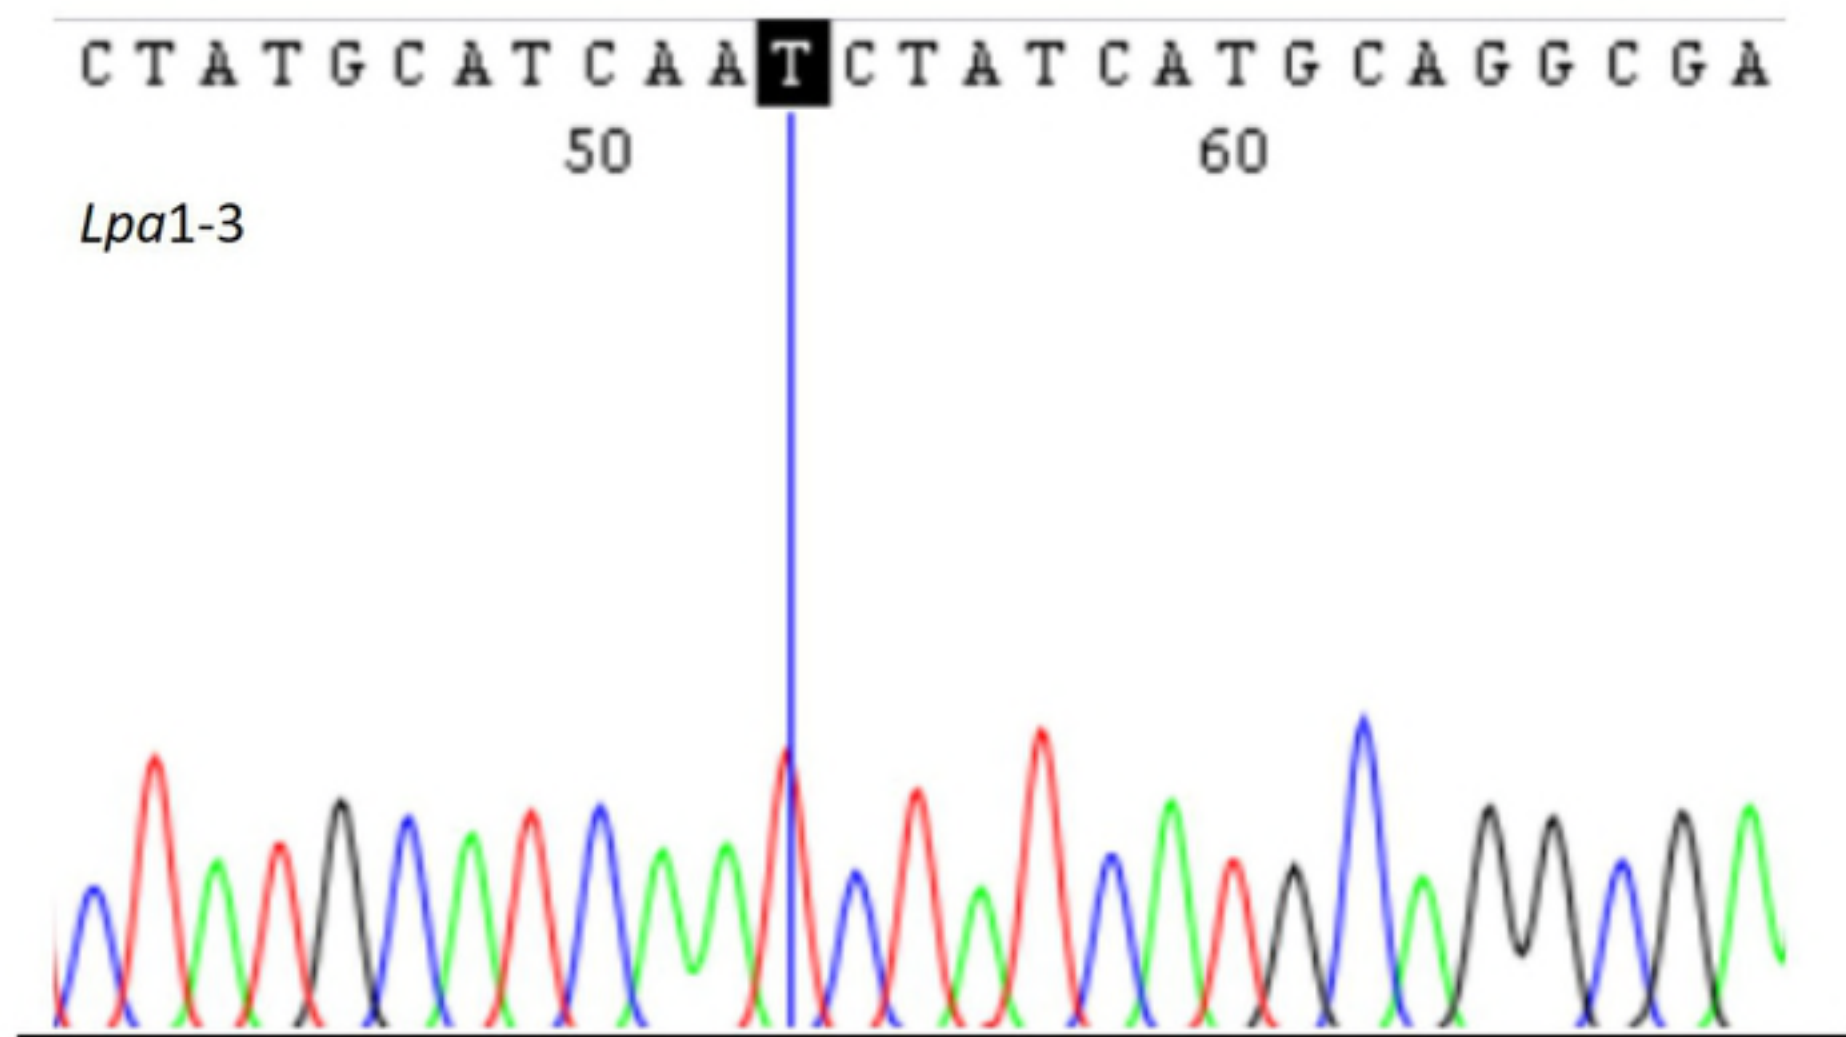

Figure4



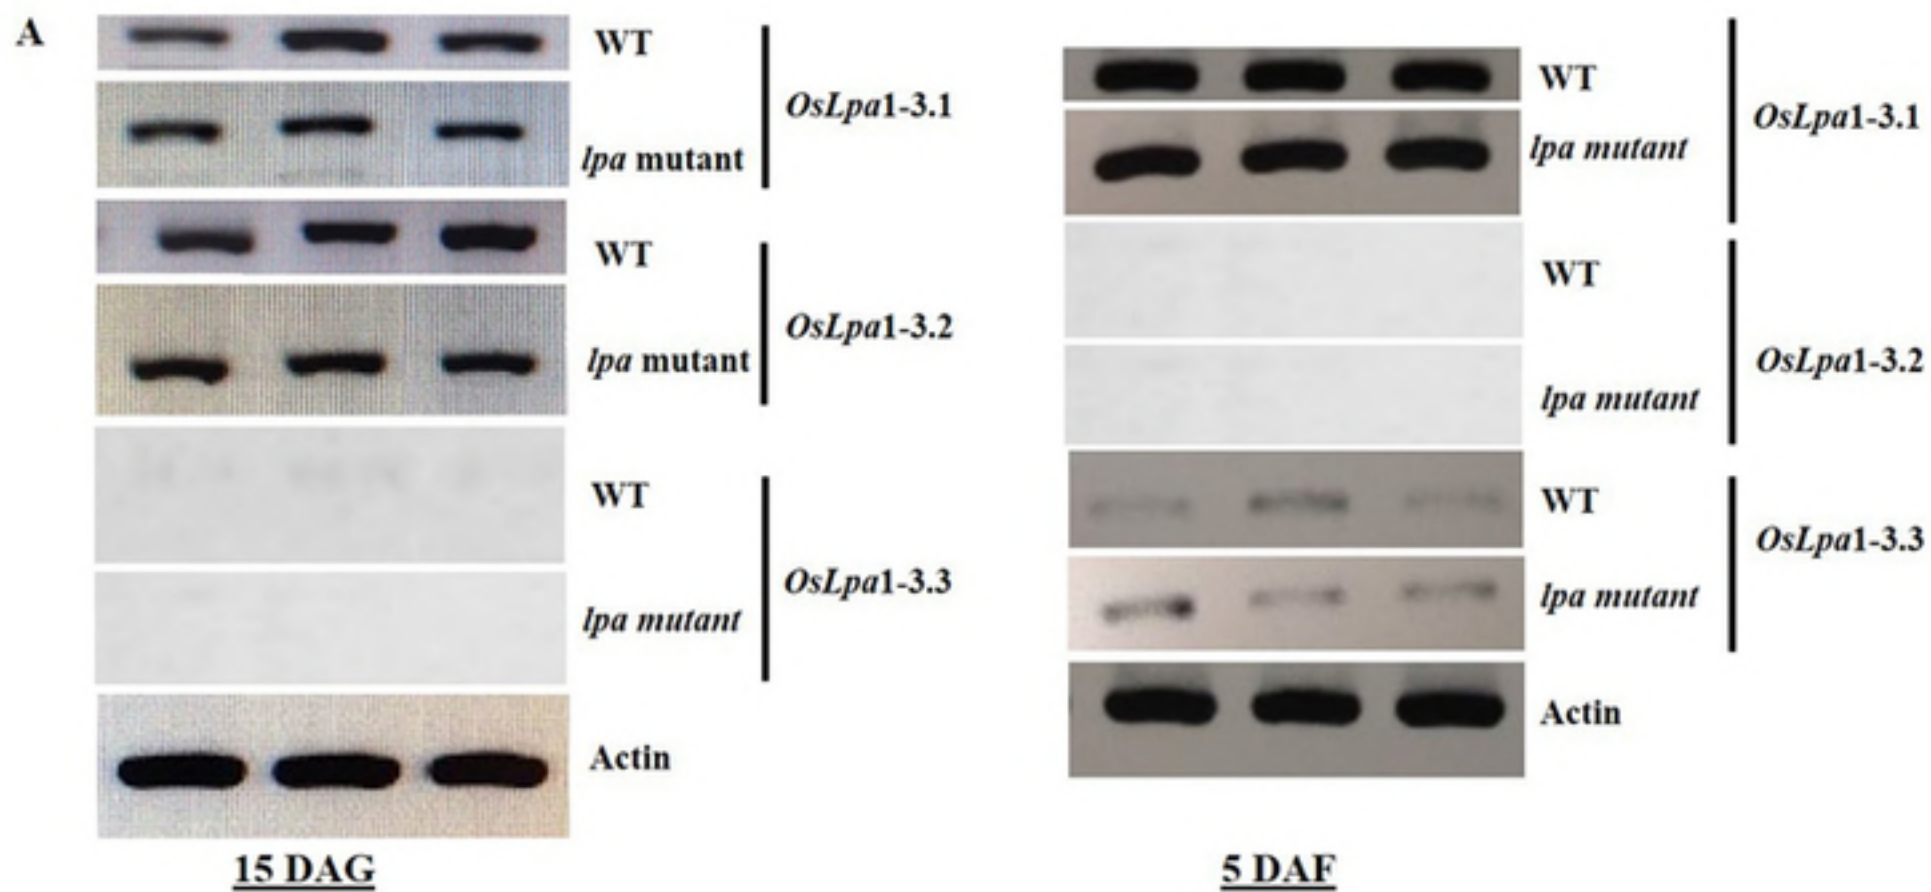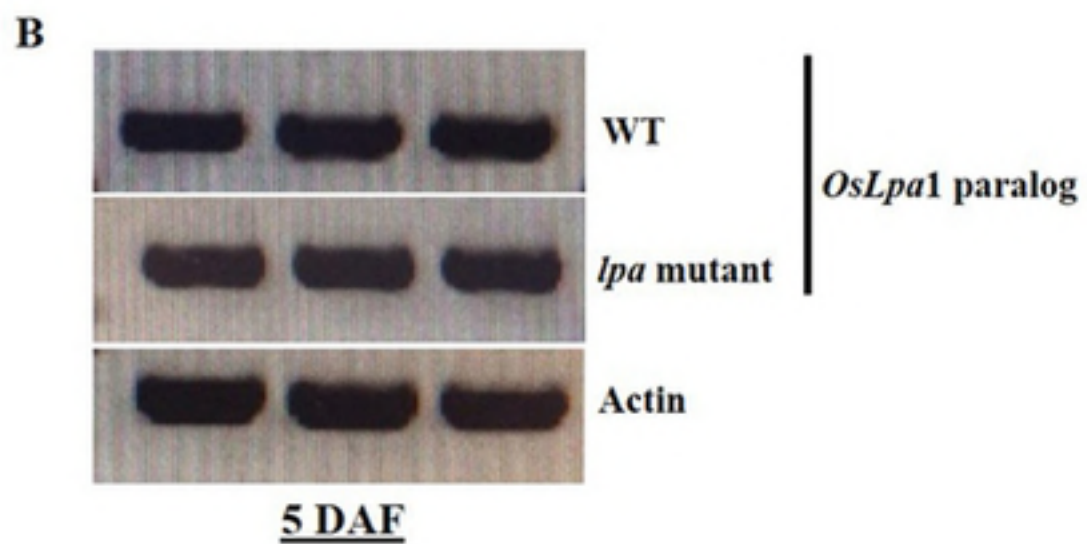

Figure 5

A

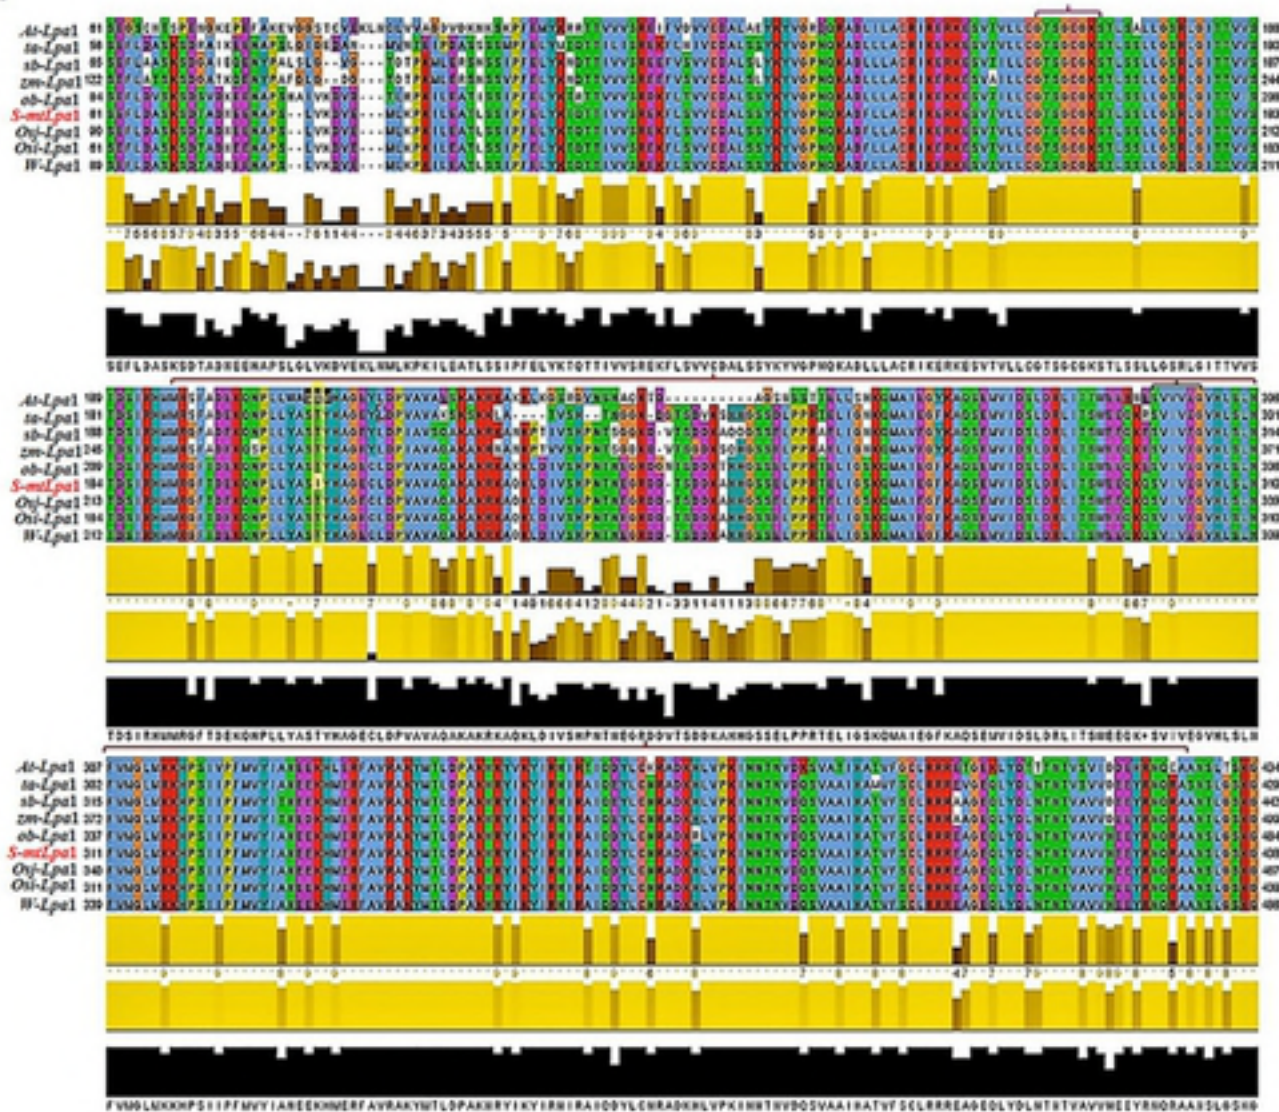

B

Walker A  
PGK2  
Walker B

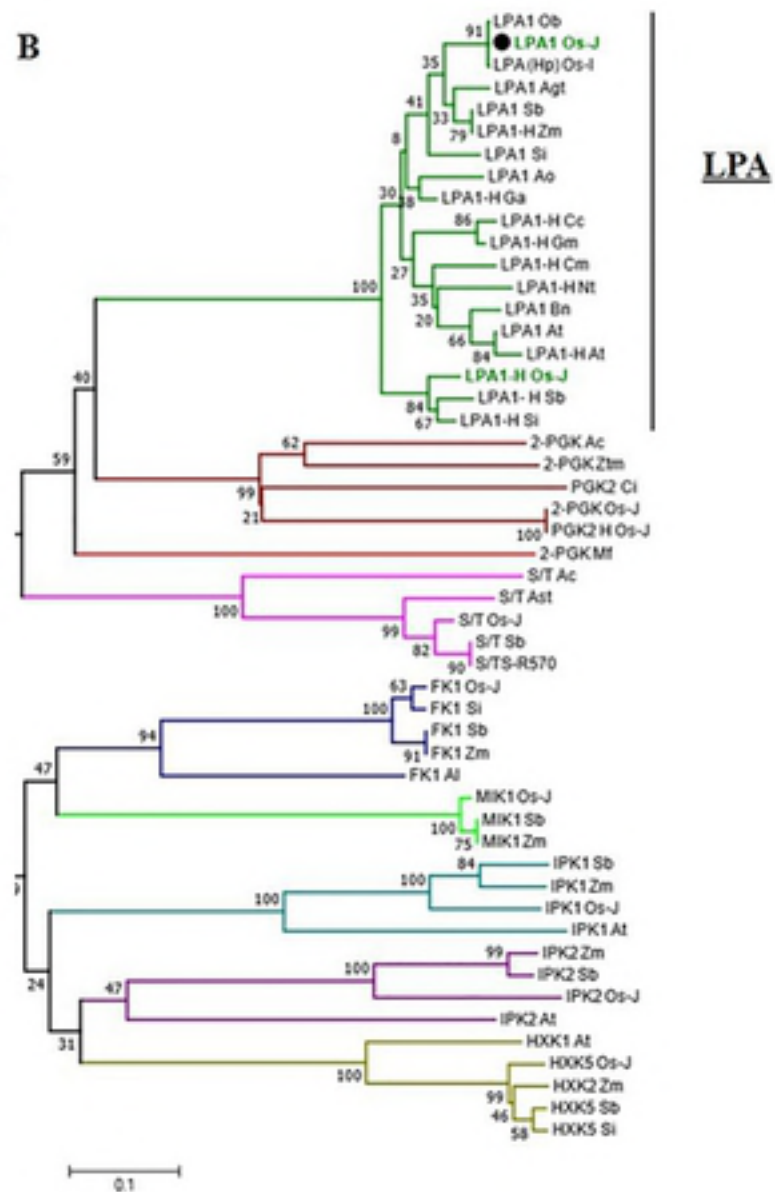

Figure6

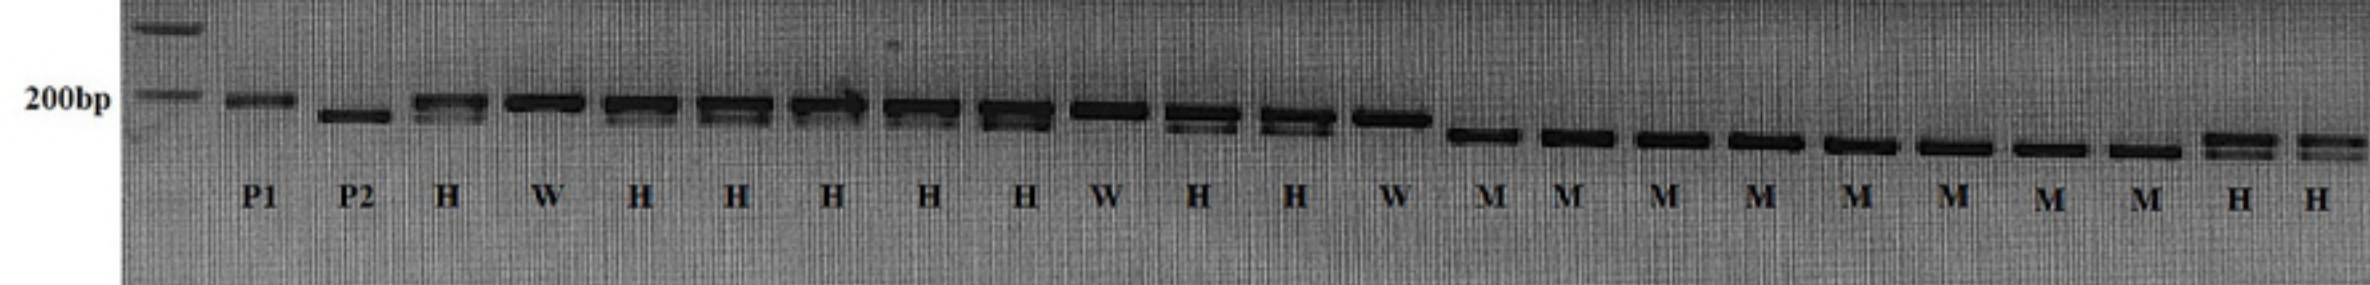

Figure7

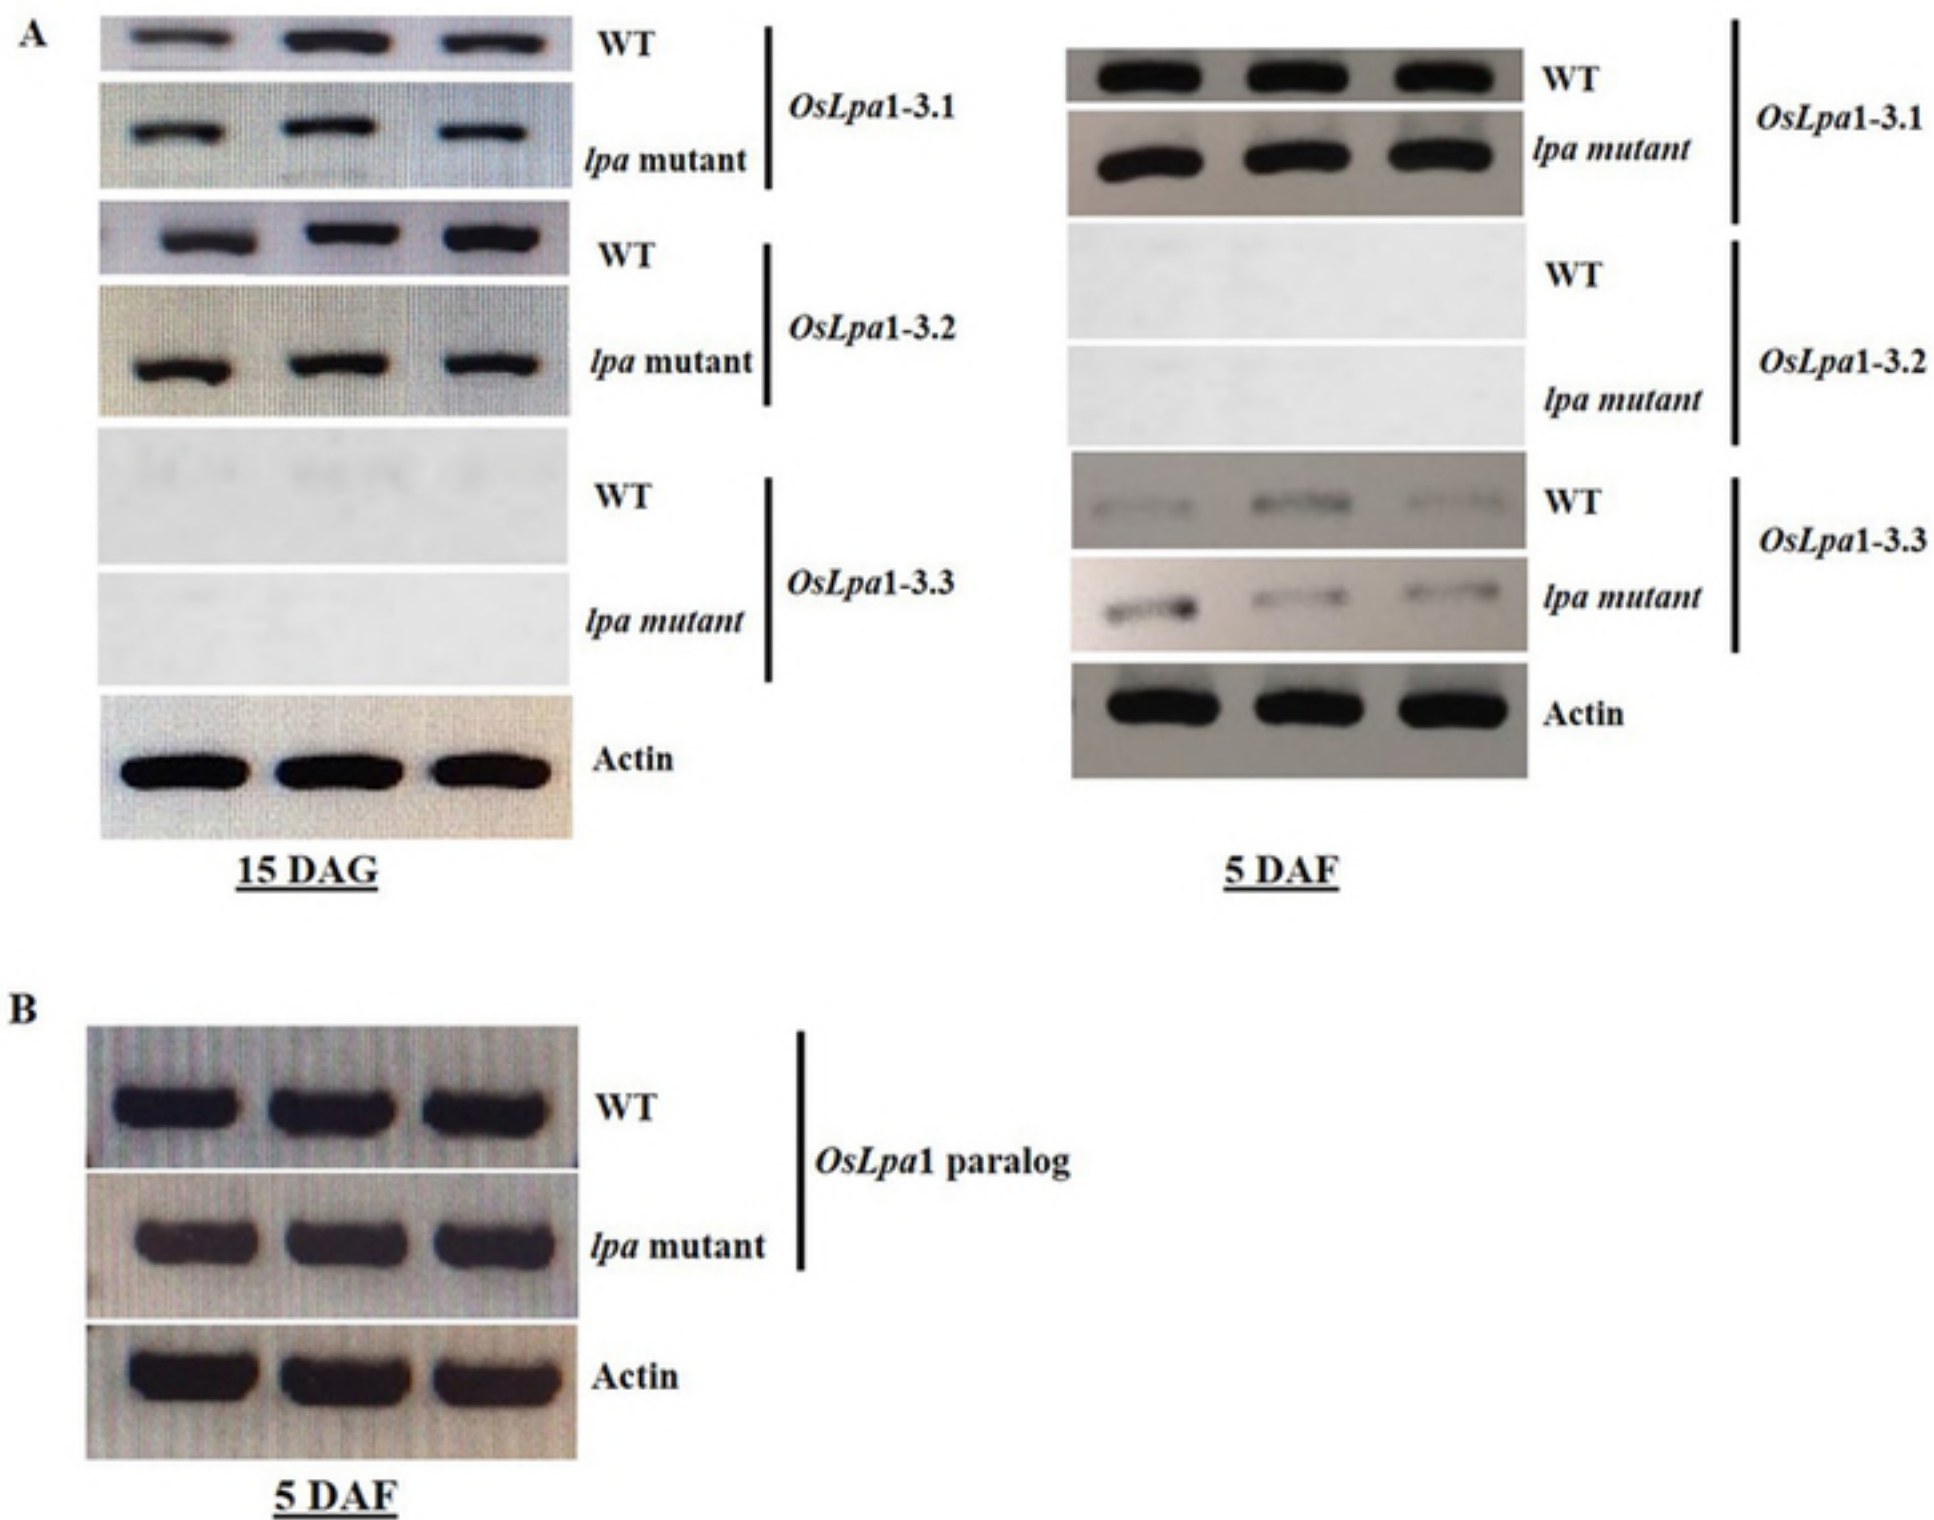

Figure8
